# Supplementary material for: Baseline scenarios of heat-related ambulance transportations under climate change in Tokyo, Japan
Source: PeerJ. 2022 Jul 29;10:e13838. doi: 10.7717/peerj.13838 (PMC9341446; doi:10.7717/peerj.13838)
Supplement: Supplemental Information 2 [file peerj-10-13838-s002.xlsx]

## Sheet: MRI_wheather.data.30Apr22
RCP	Day	year	Tasmax(℃）	RH(%)	SR(MJ/m2/day)	WS(m/s)	rsds_W(kW/m2)	WBGT
2.6	1	2015	11.3	48.7	7	2.7	0.084	8.12319
2.6	2	2015	9.8	39	9.2	2.3	0.1104	6.36766
2.6	3	2015	10.9	41.8	7	1.7	0.084	7.35183
2.6	4	2015	10.4	28.1	2.8	2.4	0.0336	5.59785
2.6	5	2015	9.6	47.9	3.5	3.2	0.042	6.25511
2.6	6	2015	8.5	39.6	9.1	2.5	0.1092	5.28207
2.6	7	2015	9	39.7	9.2	1.8	0.1104	5.76173
2.6	8	2015	13.4	48.5	10.4	3.1	0.1248	10.1992
2.6	9	2015	10.2	31.1	10.5	5	0.126	6.12407
2.6	10	2015	9.3	54.8	8.8	4.4	0.1056	6.81124
2.6	11	2015	10.9	46.5	2.7	2.4	0.0324	7.27139
2.6	12	2015	11.3	63.5	10.5	2.2	0.126	9.47345
2.6	13	2015	11.3	58.2	10.8	2	0.1296	9.13503
2.6	14	2015	11.2	60.4	9.6	1.7	0.1152	9.12227
2.6	15	2015	13.1	33.9	10.9	1.8	0.1308	8.94474
2.6	16	2015	14.9	36.3	10.5	3.4	0.126	10.5176
2.6	17	2015	9.2	33	10.9	5.2	0.1308	5.43987
2.6	18	2015	5.2	42.8	4.5	4.9	0.054	2.12645
2.6	19	2015	5	51.8	11.6	4.8	0.1392	3.00231
2.6	20	2015	5.7	40.6	11.7	5.1	0.1404	3.00785
2.6	21	2015	6.9	43.8	11.6	4.8	0.1392	4.22581
2.6	22	2015	8.3	40.6	11.9	3.8	0.1428	5.31663
2.6	23	2015	8.3	41.6	12	2.3	0.144	5.47164
2.6	24	2015	9.3	38.8	5.8	2.4	0.0696	5.6472
2.6	25	2015	8.1	38.1	1.1	2.5	0.0132	4.17236
2.6	26	2015	9.2	36.1	12.6	2.2	0.1512	5.9399
2.6	27	2015	7.7	44.4	13.2	2.5	0.1584	5.20386
2.6	28	2015	9.6	42.6	13.3	1.7	0.1596	6.78208
2.6	29	2015	8.9	37.3	13.5	2.5	0.162	5.81356
2.6	30	2015	7.9	34.9	4.8	2.6	0.0576	4.12785
2.6	31	2015	8.9	35.9	7.1	1.6	0.0852	5.27767
2.6	32	2015	10.2	74.9	5.1	2.9	0.0612	8.74842
2.6	33	2015	9.4	73.5	11.2	4.3	0.1344	8.30705
2.6	34	2015	9.5	28.5	10.4	3.3	0.1248	5.46611
2.6	35	2015	10.6	50.3	12	2.4	0.144	8.03047
2.6	36	2015	11	38.7	11	2	0.132	7.52333
2.6	37	2015	14.3	34.1	12.3	2.8	0.1476	10.0108
2.6	38	2015	15.5	73.1	12	6	0.144	14.0304
2.6	39	2015	7.4	41.5	11.8	3.6	0.1416	4.60539
2.6	40	2015	10.9	32.7	13.1	4	0.1572	7.06755
2.6	41	2015	8.7	43.3	13.9	3.8	0.1668	5.97662
2.6	42	2015	9.8	45.3	9.4	4.2	0.1128	6.69073
2.6	43	2015	8.5	48.4	2.8	3.3	0.0336	5.25704
2.6	44	2015	10.1	66.9	14	2.2	0.168	8.86011
2.6	45	2015	11.5	55.5	5.7	3	0.0684	8.65611
2.6	46	2015	9.6	43.7	6.3	3.4	0.0756	6.20685
2.6	47	2015	9.5	48.5	1	2.8	0.012	6.0084
2.6	48	2015	9.9	37.4	13.4	2.8	0.1608	6.63957
2.6	49	2015	8.6	51.5	15.6	2.6	0.1872	6.59423
2.6	50	2015	9	47.6	15.4	2.6	0.1848	6.68581
2.6	51	2015	9.2	43.1	15.1	2.8	0.1812	6.53856
2.6	52	2015	9.1	36.7	13.2	2.9	0.1584	5.8989
2.6	53	2015	6.7	37.7	1.3	3	0.0156	2.95419
2.6	54	2015	9.7	52.3	5.6	2.3	0.0672	6.86272
2.6	55	2015	12.4	35.1	2.3	2.9	0.0276	7.67457
2.6	56	2015	9.5	30.7	17.5	3.7	0.21	6.10568
2.6	57	2015	8.9	36.6	17.8	3.1	0.2136	6.03969
2.6	58	2015	11.4	75	17.7	2	0.2124	10.9149
2.6	59	2015	9.9	95.1	16.6	3.6	0.1992	10.6494
2.6	60	2015	6.3	76	13.8	3	0.1656	5.77213
2.6	61	2015	11.2	54.1	4	2.2	0.048	8.19
2.6	62	2015	15	48.5	4.1	3.2	0.0492	11.08
2.6	63	2015	17.7	68.4	6.2	4.2	0.0744	15.3402
2.6	64	2015	11.5	54.2	5.4	3.7	0.0648	8.49855
2.6	65	2015	12.3	45.6	2.2	2.7	0.0264	8.36324
2.6	66	2015	13.7	38.5	16.6	3.8	0.1992	10.1051
2.6	67	2015	7	59.9	17.3	4.7	0.2076	5.66208
2.6	68	2015	3.5	58	16.2	4.8	0.1944	2.30482
2.6	69	2015	8.5	63.1	6	2.9	0.072	6.46865
2.6	70	2015	13.2	37.4	14.4	2.4	0.1728	9.52152
2.6	71	2015	16.4	39.2	17.7	2.8	0.2124	12.5858
2.6	72	2015	15.7	33.2	13.7	2.5	0.1644	11.2256
2.6	73	2015	19.7	67	4.5	3.6	0.054	16.9676
2.6	74	2015	24.4	73.9	16.7	2.8	0.2004	23.0828
2.6	75	2015	16.2	81	15.9	3	0.1908	15.8202
2.6	76	2015	13	87.5	4.8	3.4	0.0576	12.3143
2.6	77	2015	16.4	79.3	6	2.6	0.072	15.1296
2.6	78	2015	20.8	91.9	3.4	4.6	0.0408	20.2828
2.6	79	2015	21.7	65.8	20.2	5.4	0.2424	19.786
2.6	80	2015	13.8	34.3	16.6	3.7	0.1992	9.86921
2.6	81	2015	15.1	64	20	2.2	0.24	13.6902
2.6	82	2015	14.6	72.9	5	2.8	0.06	12.7819
2.6	83	2015	15	41.2	9.1	2.9	0.1092	10.9182
2.6	84	2015	16.4	37.4	17.1	1.6	0.2052	12.4598
2.6	85	2015	17.3	40.2	4.6	2	0.0552	12.478
2.6	86	2015	15.9	85	19	2.7	0.228	16.0937
2.6	87	2015	15.6	87.8	4.6	5.1	0.0552	14.8001
2.6	88	2015	13.8	38.4	4.8	3.6	0.0576	9.28034
2.6	89	2015	13.1	34.3	22.6	1.6	0.2712	9.79895
2.6	90	2015	17.1	40.2	23.1	2.8	0.2772	13.6169
2.6	91	2015	18.8	70.3	20.6	5.4	0.2472	17.5385
2.6	92	2015	15.4	50.6	20.3	3	0.2436	12.8368
2.6	93	2015	13.1	38.4	18.1	2.6	0.2172	9.76068
2.6	94	2015	18.1	70.8	21.7	3.9	0.2604	17.0812
2.6	95	2015	21.1	61.6	23	3	0.276	19.1277
2.6	96	2015	14.1	70	22.7	2.9	0.2724	13.3709
2.6	97	2015	15	45.4	22.5	3	0.27	12.2008
2.6	98	2015	16.2	49.6	23.3	3.4	0.2796	13.6239
2.6	99	2015	16.9	46.1	22.6	2.8	0.2712	13.9275
2.6	100	2015	17.8	62	19.7	3	0.2364	15.9352
2.6	101	2015	19.3	93.8	19.5	5.8	0.234	20.1174
2.6	102	2015	21	55	6.1	3.8	0.0732	17.1165
2.6	103	2015	20.6	34.2	7.1	2.9	0.0852	14.8635
2.6	104	2015	20.3	37.3	4.9	2.6	0.0588	14.746
2.6	105	2015	19.9	58.5	23.4	2.9	0.2808	17.7639
2.6	106	2015	21	74.7	7.5	4.9	0.09	19.1139
2.6	107	2015	24.4	71.6	3	3	0.036	21.746
2.6	108	2015	22.2	73.3	13.8	6	0.1656	20.5396
2.6	109	2015	17.5	50.5	22.1	3.9	0.2652	14.7447
2.6	110	2015	22.6	58.5	17.3	4.7	0.2076	19.7119
2.6	111	2015	19.9	50.1	13.5	5	0.162	16.1761
2.6	112	2015	18.2	51.2	12.7	3.7	0.1524	14.7925
2.6	113	2015	22.7	70.6	11.9	7	0.1428	20.5353
2.6	114	2015	18.5	70.9	10.3	2.7	0.1236	16.7328
2.6	115	2015	20.6	50.6	7.9	2.5	0.0948	16.5515
2.6	116	2015	22	81.8	16.2	7.3	0.1944	21.3115
2.6	117	2015	21.8	63.3	19.7	3.2	0.2364	19.7193
2.6	118	2015	23.1	40.9	7.3	2.9	0.0876	17.6695
2.6	119	2015	25.7	54.7	8.6	3	0.1032	21.5423
2.6	120	2015	26.3	43.8	2.1	2.9	0.0252	20.2915
2.6	121	2015	23.2	63.4	5	2.1	0.06	19.9747
2.6	122	2015	25.7	61.6	20.1	2.7	0.2412	23.1702
2.6	123	2015	25.3	66	12.5	3.1	0.15	22.7387
2.6	124	2015	20.1	77.4	4.4	5.2	0.0528	18.2392
2.6	125	2015	17	58.6	25.9	8	0.3108	15.0017
2.6	126	2015	19.3	29.7	25.4	3.2	0.3048	14.6219
2.6	127	2015	20	61.5	16.2	2.5	0.1944	17.6936
2.6	128	2015	23.8	56.8	2.9	2.2	0.0348	19.6345
2.6	129	2015	25	64.7	2.2	2.7	0.0264	21.4974
2.6	130	2015	20	78.9	7.4	4.4	0.0888	18.5836
2.6	131	2015	17.4	50.4	16.1	4.5	0.1932	14.2152
2.6	132	2015	21.3	48.3	13.6	3.1	0.1632	17.3467
2.6	133	2015	26.5	44.1	12.1	3	0.1452	21.3139
2.6	134	2015	27.5	55.3	11.4	3	0.1368	23.4427
2.6	135	2015	23.9	70.9	9.4	2.9	0.1128	21.7377
2.6	136	2015	26.7	76.2	18.5	3.2	0.222	25.635
2.6	137	2015	27.1	75.5	20	4.3	0.24	25.9728
2.6	138	2015	29.5	71.5	17	2.8	0.204	27.6561
2.6	139	2015	28	49.3	16.8	1.7	0.2016	23.6441
2.6	140	2015	27.2	65.9	13.2	3.3	0.1584	24.5305
2.6	141	2015	23.3	80.5	4.1	4.7	0.0492	21.6441
2.6	142	2015	25.5	60.8	3.3	3.3	0.0396	21.5854
2.6	143	2015	25.3	55.4	2.2	2.7	0.0264	20.7397
2.6	144	2015	23.3	81.5	1.8	3.3	0.0216	21.6282
2.6	145	2015	24.8	61.7	5.2	2.7	0.0624	21.2429
2.6	146	2015	20.4	64.9	15.9	1.8	0.1908	18.4081
2.6	147	2015	20.1	74.3	19.2	2.9	0.2304	19.1968
2.6	148	2015	22.5	87.2	16.1	3.5	0.1932	22.5655
2.6	149	2015	26.7	43.8	13.9	2.1	0.1668	21.6374
2.6	150	2015	28.3	48.7	4.2	2.4	0.0504	22.8174
2.6	151	2015	29.8	61.6	19	3.3	0.228	26.8145
2.6	152	2015	23.8	84.4	27.3	3.9	0.3276	24.2349
2.6	153	2015	25.9	80.5	27.5	3.4	0.33	25.8948
2.6	154	2015	27.4	52.9	23.5	2.8	0.282	23.9119
2.6	155	2015	21.5	70.8	18.3	2.1	0.2196	20.1645
2.6	156	2015	21.5	80.1	6.4	2.5	0.0768	20.1782
2.6	157	2015	26.7	71	3.6	1.9	0.0432	23.9633
2.6	158	2015	25.5	73.3	20	2.3	0.24	24.3124
2.6	159	2015	19.7	82	16.1	2.1	0.1932	19.381
2.6	160	2015	18.6	92.6	18.7	2.6	0.2244	19.431
2.6	161	2015	23.9	82.6	17.8	2.2	0.2136	23.6499
2.6	162	2015	24.2	76.3	6.7	2.5	0.0804	22.4084
2.6	163	2015	24.4	65.5	8.5	2.7	0.102	21.5617
2.6	164	2015	18.9	66.1	13.6	2.9	0.1632	16.9037
2.6	165	2015	20.7	63.2	2.7	2.6	0.0324	17.4276
2.6	166	2015	20.7	69.7	12.1	2	0.1452	18.866
2.6	167	2015	23.6	69.5	17.5	2.3	0.21	21.9382
2.6	168	2015	23.9	75.9	24.8	2.6	0.2976	23.3532
2.6	169	2015	23.9	89.9	24.3	2.8	0.2916	24.8128
2.6	170	2015	26.4	60.4	15.8	3.2	0.1896	23.3528
2.6	171	2015	27.1	52.2	12.4	2.7	0.1488	22.8158
2.6	172	2015	29.1	54.3	17.9	3	0.2148	25.224
2.6	173	2015	30.1	42.5	23.8	2.8	0.2856	25.0285
2.6	174	2015	30.2	66	10.8	2.4	0.1296	27.1951
2.6	175	2015	22.9	74.3	12.8	2.5	0.1536	21.4344
2.6	176	2015	22.9	72.9	5	2.6	0.06	20.6607
2.6	177	2015	24.4	72.5	11.5	2.7	0.138	22.5572
2.6	178	2015	22.5	76.5	25.4	2.6	0.3048	22.1108
2.6	179	2015	22.9	91.6	21.6	2.5	0.2592	23.8441
2.6	180	2015	23.9	87.7	5.6	1.4	0.0672	23.3142
2.6	181	2015	27.9	74.7	9.9	2.6	0.1188	26.014
2.6	182	2015	23	76	6.2	2.6	0.0744	21.1805
2.6	183	2015	22.3	85.7	14.9	2.5	0.1788	22.1857
2.6	184	2015	27.1	85.6	9.5	1.7	0.114	26.5417
2.6	185	2015	32	73.2	18.8	2	0.2256	30.406
2.6	186	2015	31	78	5	2.9	0.06	28.9736
2.6	187	2015	26.3	81	15.1	1.6	0.1812	25.6558
2.6	188	2015	28.2	78.3	9.1	1.6	0.1092	26.7251
2.6	189	2015	28.1	80.2	3.7	2.1	0.0444	26.3787
2.6	190	2015	32.2	73.1	5	2	0.06	29.5364
2.6	191	2015	30.4	78.3	4	1.5	0.048	28.4284
2.6	192	2015	34.1	69.4	15.2	1.7	0.1824	31.6462
2.6	193	2015	36.5	62.9	4.2	2.1	0.0504	32.0721
2.6	194	2015	34.7	73	9.5	2	0.114	32.2623
2.6	195	2015	35.5	71.2	19.3	1.7	0.2316	33.4949
2.6	196	2015	31.9	74.6	10.5	2.5	0.126	29.866
2.6	197	2015	34.6	72.3	9.8	2.2	0.1176	32.0828
2.6	198	2015	37.9	71.6	17.7	1.4	0.2124	35.7268
2.6	199	2015	32.7	81.1	4.7	2.2	0.0564	31.0368
2.6	200	2015	28.4	83.1	16	2.2	0.192	27.9783
2.6	201	2015	32.1	74	16.7	2.6	0.2004	30.4284
2.6	202	2015	34.1	68.8	27.6	2.8	0.3312	32.2866
2.6	203	2015	34.3	69	22.8	2.2	0.2736	32.2555
2.6	204	2015	33.8	71.5	21.6	2	0.2592	32.0641
2.6	205	2015	33.3	75.9	9.5	1.5	0.114	31.3539
2.6	206	2015	30.7	80.9	1.9	1.8	0.0228	28.8467
2.6	207	2015	31.9	77.1	5.2	2.3	0.0624	29.7739
2.6	208	2015	32.4	73.2	9.1	2.5	0.1092	30.0476
2.6	209	2015	24	96.9	21.1	4.4	0.2532	25.3761
2.6	210	2015	26.5	97	11	6.4	0.132	27.1074
2.6	211	2015	32.9	62.4	7.9	3	0.0948	28.9556
2.6	212	2015	32.2	61.7	10.2	1.4	0.1224	28.4961
2.6	213	2015	32	68.3	10.3	2.1	0.1236	29.1443
2.6	214	2015	32.8	67.1	16	2.3	0.192	30.1434
2.6	215	2015	32.9	67.2	17.6	2.2	0.2112	30.3666
2.6	216	2015	32.9	77.3	17.8	2.3	0.2136	31.7225
2.6	217	2015	28.7	78.4	21.4	2.3	0.2568	28.0574
2.6	218	2015	32.8	68.2	16.5	2.3	0.198	30.325
2.6	219	2015	33	68.3	13.8	2.4	0.1656	30.3263
2.6	220	2015	32.5	72.4	18.1	1.9	0.2172	30.7332
2.6	221	2015	29.5	74.9	17.5	1.9	0.21	28.162
2.6	222	2015	32.1	72.5	21.8	2.2	0.2616	30.592
2.6	223	2015	32.2	73.2	20	2.6	0.24	30.6406
2.6	224	2015	30.7	74.7	22.3	5.7	0.2676	29.3772
2.6	225	2015	30.4	63.2	22.4	5.1	0.2688	27.6808
2.6	226	2015	32.9	59.3	14.1	2.1	0.1692	29.0707
2.6	227	2015	33.4	69.5	16	2.2	0.192	31.0315
2.6	228	2015	32.6	72.2	5.3	2.1	0.0636	29.8162
2.6	229	2015	32.4	74.5	4.2	2.6	0.0504	29.8083
2.6	230	2015	31.4	79.9	6	2.4	0.072	29.7168
2.6	231	2015	31.3	80.8	9.7	1.9	0.1164	30.0646
2.6	232	2015	32.1	80.3	2.7	1.9	0.0324	30.1928
2.6	233	2015	26.8	85.2	2.1	1.8	0.0252	25.574
2.6	234	2015	25.5	85.7	2	2.1	0.024	24.325
2.6	235	2015	31.2	79.8	4.2	1.9	0.0504	29.3864
2.6	236	2015	31	81.6	3.7	2.1	0.0444	29.3685
2.6	237	2015	26.9	89.1	5	2.6	0.06	26.3305
2.6	238	2015	27.4	87.7	11.5	3.3	0.138	27.1476
2.6	239	2015	25.3	87.2	20.6	4.7	0.2472	25.5709
2.6	240	2015	27.5	74.1	21.4	3.9	0.2568	26.303
2.6	241	2015	33.9	65.4	21.3	1.7	0.2556	31.3247
2.6	242	2015	31	77.1	17	2.1	0.204	29.8281
2.6	243	2015	29.6	88.1	4.2	2.8	0.0504	28.8139
2.6	244	2015	28.7	100	2.1	3.9	0.0252	29.1169
2.6	245	2015	28.2	98.4	13	2.8	0.156	29.3633
2.6	246	2015	33.1	80.4	22.3	2.1	0.2676	32.6347
2.6	247	2015	31.3	84.6	20.1	3.9	0.2412	31.1871
2.6	248	2015	26.4	79.3	15.8	5.5	0.1896	25.385
2.6	249	2015	27.4	71.8	18.4	5	0.2208	25.679
2.6	250	2015	23.6	77.1	21.4	4.6	0.2568	22.8716
2.6	251	2015	22.6	81.4	15.9	4	0.1908	22.0221
2.6	252	2015	23.6	79.1	15	3.3	0.18	22.7263
2.6	253	2015	21.7	86.6	16.5	3.5	0.198	21.7414
2.6	254	2015	25.2	76.4	4	3.9	0.048	23.0693
2.6	255	2015	22.2	83.2	14.6	3.9	0.1752	21.7299
2.6	256	2015	24.2	78.8	13.6	3.4	0.1632	23.166
2.6	257	2015	27.9	71.5	11	3.2	0.132	25.6848
2.6	258	2015	26.3	67.7	11.6	3.5	0.1392	23.7696
2.6	259	2015	26.4	75.7	14	3.8	0.168	24.9408
2.6	260	2015	28.2	80.1	9.1	2.9	0.1092	26.8663
2.6	261	2015	28.8	99.4	5.8	4.9	0.0696	29.4086
2.6	262	2015	33.3	72.1	4.2	2.6	0.0504	30.3425
2.6	263	2015	29.3	80.8	4.1	2.2	0.0492	27.6443
2.6	264	2015	26.5	88.6	16.6	2.8	0.1992	26.7597
2.6	265	2015	27.9	77.4	12.8	3.2	0.1536	26.5226
2.6	266	2015	30.2	70.5	16.1	3.3	0.1932	28.0998
2.6	267	2015	18.2	81.2	14.6	6	0.1752	17.5169
2.6	268	2015	22.2	81.8	17.6	7.6	0.2112	21.5861
2.6	269	2015	26.3	71.5	18.5	2.2	0.222	24.7725
2.6	270	2015	25.8	75.4	17.5	2.1	0.21	24.6782
2.6	271	2015	26.3	71.9	7.6	2.2	0.0912	24.0083
2.6	272	2015	26.4	71	3.6	2.2	0.0432	23.6634
2.6	273	2015	25	74.7	10.4	2.4	0.1248	23.3005
2.6	274	2015	28.6	75.3	9.7	2.1	0.1164	26.7667
2.6	275	2015	28.8	77.1	11.6	2.2	0.1392	27.3178
2.6	276	2015	29	80.1	4.7	2.6	0.0564	27.2961
2.6	277	2015	29.7	55.8	5.6	2.4	0.0672	25.0458
2.6	278	2015	23	60.1	4.7	3.2	0.0564	19.3572
2.6	279	2015	22.1	55.8	14.9	2.2	0.1788	18.9581
2.6	280	2015	23.6	63.6	10	2.2	0.12	20.7663
2.6	281	2015	25.6	71.1	17.8	2.2	0.2136	24.0197
2.6	282	2015	27.1	75.2	15.2	2.1	0.1824	25.7357
2.6	283	2015	27.8	67.3	5	2	0.06	24.6755
2.6	284	2015	27.9	69.4	3	2.5	0.036	24.8173
2.6	285	2015	29.7	71.2	15.4	1.8	0.1848	27.7525
2.6	286	2015	27.9	76.7	15.1	2.1	0.1812	26.6705
2.6	287	2015	29.8	74	3.3	2.9	0.0396	27.1745
2.6	288	2015	29.6	76	1.9	3.1	0.0228	27.0973
2.6	289	2015	28.2	80.7	15.2	5.7	0.1824	27.2384
2.6	290	2015	28.1	60.6	15.7	2.4	0.1884	24.9647
2.6	291	2015	22.2	49.3	13.2	2.6	0.1584	18.2364
2.6	292	2015	19.3	55.8	7.2	2.1	0.0864	15.8572
2.6	293	2015	21.1	69.4	14.2	1.9	0.1704	19.3732
2.6	294	2015	23.6	85.1	10.5	3.1	0.126	23.0395
2.6	295	2015	25.9	74.9	7.2	2.6	0.0864	23.9138
2.6	296	2015	21.3	54.3	2.9	2.5	0.0348	17.1162
2.6	297	2015	22.1	73	6.8	2.1	0.0816	20.0918
2.6	298	2015	24	75.9	9.1	2.2	0.1092	22.3855
2.6	299	2015	24.9	83.9	2.8	4.1	0.0336	23.4919
2.6	300	2015	25.4	93.3	5	3.1	0.06	25.2777
2.6	301	2015	24.8	85.5	10.8	4.1	0.1296	24.2296
2.6	302	2015	21	57.9	11	2.8	0.132	17.853
2.6	303	2015	18.5	69.5	5	2.1	0.06	16.2078
2.6	304	2015	20.6	66	3	1.7	0.036	17.6866
2.6	305	2015	22	39.2	14.9	1.9	0.1788	17.1982
2.6	306	2015	24.3	77	13.9	2	0.1668	23.1696
2.6	307	2015	25	42.5	13.7	2.2	0.1644	20.0066
2.6	308	2015	23.1	76.3	11.2	2.2	0.1344	21.7305
2.6	309	2015	25.9	86.6	13.1	3	0.1572	25.6742
2.6	310	2015	17.1	94.2	11.8	1.8	0.1416	17.6157
2.6	311	2015	16.5	68	11.2	2	0.1344	14.7102
2.6	312	2015	17.1	35.9	13.1	1.9	0.1572	12.6161
2.6	313	2015	18.9	68.2	12.7	2	0.1524	17.0829
2.6	314	2015	20.7	70.1	12.4	2.9	0.1488	18.8763
2.6	315	2015	19.3	64.5	9.8	2.6	0.1176	16.853
2.6	316	2015	18.1	40.6	11.2	3.1	0.1344	13.6681
2.6	317	2015	14.5	70.8	1.8	1.9	0.0216	12.2929
2.6	318	2015	20.8	76.5	1.3	5.4	0.0156	18.5403
2.6	319	2015	14.9	54.8	11.7	2.9	0.1404	12.1353
2.6	320	2015	15.6	42.5	12	1.6	0.144	11.8386
2.6	321	2015	17.6	44.5	11.3	2.4	0.1356	13.6353
2.6	322	2015	15.5	67	7.7	1.9	0.0924	13.4231
2.6	323	2015	19.5	84.2	11	3.1	0.132	18.9609
2.6	324	2015	16.7	50.8	10.6	2.2	0.1272	13.3572
2.6	325	2015	13.2	67.4	11	2.7	0.132	11.5285
2.6	326	2015	13.7	66.7	10.5	1.9	0.126	11.9473
2.6	327	2015	16.8	52.8	8.3	2.7	0.0996	13.4081
2.6	328	2015	14	53.5	10.4	2.4	0.1248	11.1566
2.6	329	2015	13.1	66.3	10	1.9	0.12	11.3202
2.6	330	2015	16.8	61.6	10.3	2.4	0.1236	14.3445
2.6	331	2015	16.5	86.8	9.6	1.8	0.1152	16.2061
2.6	332	2015	19.2	49.8	7.7	3.5	0.0924	15.1674
2.6	333	2015	10.2	50.9	7.9	2.7	0.0948	7.37955
2.6	334	2015	11.8	67.6	8.7	1.5	0.1044	10.1264
2.6	335	2015	16.2	67	8.7	3.6	0.1044	14.058
2.6	336	2015	11.6	48.3	5.3	2	0.0636	8.25617
2.6	337	2015	12.6	59.7	5.7	1.7	0.0684	10.0288
2.6	338	2015	15.4	61.7	7.7	2.2	0.0924	12.8764
2.6	339	2015	14.3	87.1	6.2	4.8	0.0744	13.6081
2.6	340	2015	12.9	84.2	3.2	3.5	0.0384	11.8239
2.6	341	2015	14.9	45.1	3.8	2	0.0456	10.76
2.6	342	2015	14.4	55.8	8.2	1.7	0.0984	11.5615
2.6	343	2015	15.9	85.3	8.4	3.3	0.1008	15.306
2.6	344	2015	16.4	47.4	8.2	2.5	0.0984	12.5952
2.6	345	2015	15.2	46.5	3.3	1.7	0.0396	11.1083
2.6	346	2015	12.1	75.8	0.8	2.5	0.0096	10.2723
2.6	347	2015	11.8	30	3.2	4.9	0.0384	6.77025
2.6	348	2015	11.2	46.6	8.6	2.9	0.1032	8.00671
2.6	349	2015	11.5	52.5	6.5	3	0.078	8.50991
2.6	350	2015	14.3	43	6.1	2.9	0.0732	10.2176
2.6	351	2015	16.3	72.7	10.7	3.5	0.1284	14.7987
2.6	352	2015	9.9	28.5	8.2	3.5	0.0984	5.60766
2.6	353	2015	9	55.5	5.8	4.4	0.0696	6.34177
2.6	354	2015	11.3	64.9	9.9	3	0.1188	9.47942
2.6	355	2015	13.7	65.7	8.4	1.8	0.1008	11.7097
2.6	356	2015	15.5	58.4	2	2.5	0.024	12.1931
2.6	357	2015	13.4	47.5	9.7	3.6	0.1164	10.0393
2.6	358	2015	12.5	41.8	10.3	1.8	0.1236	8.98165
2.6	359	2015	14.7	20.7	5.4	1.7	0.0648	8.78054
2.6	360	2015	16.6	77.9	3	1.6	0.036	15.0033
2.6	361	2015	19.1	59.6	8.7	3.3	0.1044	16.0845
2.6	362	2015	14.1	39.7	7.9	1.7	0.0948	10.0029
2.6	363	2015	13.9	67.1	9	2	0.108	12.0408
2.6	364	2015	15.5	37.7	10.5	4	0.126	11.1036
2.6	365	2015	10.4	59.8	4.1	5.1	0.0492	7.70463
2.6	1	2016	11.2	44.1	9.1	3	0.1092	7.86564
2.6	2	2016	12.7	28.3	8.6	1.7	0.1032	8.0189
2.6	3	2016	16.1	52.8	3.7	4.3	0.0444	12.3098
2.6	4	2016	16.2	88.9	7.2	2.8	0.0864	15.8373
2.6	5	2016	12.1	70.1	9.7	2.6	0.1164	10.6044
2.6	6	2016	13.1	51.5	10	2.5	0.12	10.1662
2.6	7	2016	10.4	38.8	9.5	5.4	0.114	6.70986
2.6	8	2016	9.2	49.6	7.9	2.9	0.0948	6.40094
2.6	9	2016	12.7	46.1	2.6	1.7	0.0312	8.84025
2.6	10	2016	13.2	86.4	10.4	3.6	0.1248	12.8735
2.6	11	2016	8.4	53.9	10.7	3.5	0.1284	6.15087
2.6	12	2016	11.7	51.8	10.9	2.2	0.1308	9.03528
2.6	13	2016	13.3	43.7	8.5	2	0.102	9.65834
2.6	14	2016	14	51.7	7.9	3.4	0.0948	10.7599
2.6	15	2016	8.4	38.7	3.8	4.1	0.0456	4.61004
2.6	16	2016	8.9	48.1	11.4	3.2	0.1368	6.30042
2.6	17	2016	12.1	39.6	11.5	2	0.138	8.55993
2.6	18	2016	15.4	57.5	10.4	3.5	0.1248	12.6708
2.6	19	2016	10.3	38.6	11.7	1.5	0.1404	7.00515
2.6	20	2016	9.7	73	11.2	1.7	0.1344	8.70779
2.6	21	2016	12.3	49.9	6.5	2.1	0.078	9.08141
2.6	22	2016	11.7	51	11.7	1.7	0.1404	9.0679
2.6	23	2016	12.6	49.7	11.5	1.1	0.138	9.78606
2.6	24	2016	15.4	63.9	5.7	2.6	0.0684	12.8694
2.6	25	2016	17.8	45.5	11.8	5.8	0.1416	13.7413
2.6	26	2016	12.2	47.6	12.2	3.9	0.1464	9.17361
2.6	27	2016	10.9	35.3	12.5	3.2	0.15	7.24853
2.6	28	2016	9.8	29.5	7.9	2.7	0.0948	5.61336
2.6	29	2016	9.5	26.7	7.5	1.5	0.09	5.22074
2.6	30	2016	9	77	13.4	3	0.1608	8.39007
2.6	31	2016	9.1	37.3	13	2.5	0.156	5.94532
2.6	32	2016	12.6	62	2.6	2.4	0.0312	9.8929
2.6	33	2016	16.4	76.3	1.1	4.5	0.0132	14.3399
2.6	34	2016	12.5	41.6	0.8	2	0.0096	8.15606
2.6	35	2016	10.6	52.2	1.8	3.6	0.0216	7.2515
2.6	36	2016	14.1	59.8	11.7	2.3	0.1404	11.8464
2.6	37	2016	15.7	61.2	12.5	3.6	0.15	13.4044
2.6	38	2016	11.9	34.1	12.2	3.6	0.1464	7.95458
2.6	39	2016	10.3	47.6	12.8	3.6	0.1536	7.5752
2.6	40	2016	11.5	63	3.5	2.9	0.042	9.00632
2.6	41	2016	12.5	41.3	0.9	2.8	0.0108	8.09716
2.6	42	2016	14.2	37.1	13.3	2.3	0.1596	10.2672
2.6	43	2016	14.1	26.9	13.4	2.4	0.1608	9.38311
2.6	44	2016	16	27.7	13.3	4.9	0.1596	10.8458
2.6	45	2016	12.6	25.9	12.2	3	0.1464	7.96472
2.6	46	2016	4.1	82.8	2.4	3.1	0.0288	3.07583
2.6	47	2016	2.6	85.3	13.8	5.1	0.1656	2.52984
2.6	48	2016	4.1	69.5	13.1	2.8	0.1572	3.30579
2.6	49	2016	9.9	57.9	14.3	3.5	0.1716	8.02477
2.6	50	2016	11.4	65.5	15.3	4.5	0.1836	9.9329
2.6	51	2016	5.2	68.4	13.5	4.3	0.162	4.22347
2.6	52	2016	3.4	67.1	12.7	3.6	0.1524	2.46008
2.6	53	2016	6.2	66.6	4.8	3	0.0576	4.4417
2.6	54	2016	6.9	67.2	1.2	2.8	0.0144	4.82333
2.6	55	2016	10.4	64.9	14.4	2.2	0.1728	9.0328
2.6	56	2016	12.6	43.2	3.9	2.8	0.0468	8.58852
2.6	57	2016	13.3	67.6	12	3	0.144	11.6961
2.6	58	2016	11.4	51.8	2.3	3.6	0.0276	7.97753
2.6	59	2016	15.3	31.1	18.7	4	0.2244	10.9855
2.6	60	2016	15.2	56.3	14.7	2.4	0.1764	12.7774
2.6	61	2016	12.9	81.8	5.4	3.3	0.0648	11.8439
2.6	62	2016	8.7	46.6	13.4	2.9	0.1608	6.19859
2.6	63	2016	11	49.4	10.1	1.4	0.1212	8.23169
2.6	64	2016	17.1	76.1	4.8	4	0.0576	15.3454
2.6	65	2016	21.6	80.4	4	4.7	0.048	19.9763
2.6	66	2016	13.1	49.1	14	2.8	0.168	10.2702
2.6	67	2016	11	45	15.2	2.2	0.1824	8.26166
2.6	68	2016	13.1	48.1	4.1	2.8	0.0492	9.40703
2.6	69	2016	8.7	50.4	11.1	3.2	0.1332	6.24678
2.6	70	2016	11.7	44.1	4.6	3.1	0.0552	7.92084
2.6	71	2016	15.5	34.8	2	4.2	0.024	10.1451
2.6	72	2016	8	45.7	11.2	4.3	0.1344	5.28845
2.6	73	2016	11.2	58.8	14.1	2.9	0.1692	9.28291
2.6	74	2016	14.4	46.1	16.1	2.4	0.1932	11.3472
2.6	75	2016	15.3	58.7	17.7	2.2	0.2124	13.2862
2.6	76	2016	15.4	68.2	19.7	3.8	0.2364	14.2016
2.6	77	2016	12.9	63.8	16.5	3.1	0.198	11.3594
2.6	78	2016	9.7	72.8	3.3	2.2	0.0396	8.01893
2.6	79	2016	13.7	45.7	14.4	2.2	0.1728	10.5975
2.6	80	2016	16.4	87.3	12.9	3.2	0.1548	16.3228
2.6	81	2016	16.8	66.2	4.9	5	0.0588	14.1536
2.6	82	2016	11.5	46.6	2.4	3.5	0.0288	7.71162
2.6	83	2016	14.7	44.9	18.1	2.3	0.2172	11.6554
2.6	84	2016	17.3	73	5.2	5.2	0.0624	15.2296
2.6	85	2016	12.4	42.1	20.1	4.6	0.2412	9.45837
2.6	86	2016	11.9	56.5	15.9	3.7	0.1908	9.83503
2.6	87	2016	13.7	51.1	8.4	1.9	0.1008	10.5739
2.6	88	2016	19.9	66.5	20.6	4.6	0.2472	18.2556
2.6	89	2016	22.5	77.3	5.2	2.9	0.0624	20.7349
2.6	90	2016	15.8	72.7	13.8	2.2	0.1656	14.633
2.6	91	2016	14.7	36.4	2.7	3.6	0.0324	9.70045
2.6	92	2016	16.3	31.8	3.6	2.5	0.0432	10.797
2.6	93	2016	20.6	30.8	14.9	2.8	0.1788	15.138
2.6	94	2016	21.2	63.3	11.3	3	0.1356	18.5817
2.6	95	2016	21.9	82.6	10.7	5.3	0.1284	21.0038
2.6	96	2016	24.8	77.4	17.7	5.5	0.2124	23.7619
2.6	97	2016	24.8	75.3	1.7	2.9	0.0204	22.4208
2.6	98	2016	24.9	68.8	2.1	2.7	0.0252	21.8476
2.6	99	2016	21	88	13.8	4	0.1656	20.9663
2.6	100	2016	16.6	44.9	20.9	2.6	0.2508	13.4681
2.6	101	2016	18	50.8	14.6	2.9	0.1752	14.7651
2.6	102	2016	17.4	49.7	2.9	2.7	0.0348	13.2141
2.6	103	2016	23	50.2	24	3.5	0.288	19.706
2.6	104	2016	23	71	22	2.9	0.264	21.7927
2.6	105	2016	19.2	95.8	20.1	3.2	0.2412	20.3914
2.6	106	2016	21.1	80.4	11.3	2.8	0.1356	20.1943
2.6	107	2016	24.4	45.4	5.4	2.8	0.0648	19.117
2.6	108	2016	23.3	65.1	24.7	2.7	0.2964	21.6289
2.6	109	2016	21.3	90.8	16.2	2.8	0.1944	21.7836
2.6	110	2016	24.8	70.4	2.6	3.8	0.0312	21.911
2.6	111	2016	19.4	31	15.8	3	0.1896	14.2196
2.6	112	2016	22.1	37	25.7	2.9	0.3084	17.7014
2.6	113	2016	23.9	79	22.4	5.4	0.2688	23.3802
2.6	114	2016	28.7	59.2	11.5	3.4	0.138	24.9759
2.6	115	2016	23	53.6	20.2	2.6	0.2424	19.8758
2.6	116	2016	19.8	75.4	17.9	2.9	0.2148	18.9287
2.6	117	2016	21.4	38.1	24.7	3.6	0.2964	17.1227
2.6	118	2016	21	47.2	22.1	3.5	0.2652	17.5304
2.6	119	2016	18.3	61.5	18.4	3.7	0.2208	16.2214
2.6	120	2016	18.3	59.6	3.8	2.8	0.0456	14.9781
2.6	121	2016	20.1	57.1	25.7	3	0.3084	17.941
2.6	122	2016	23.3	64.6	16	3.3	0.192	20.9788
2.6	123	2016	19.8	80.1	22.3	3.6	0.2676	19.6224
2.6	124	2016	20.8	51.4	27.2	3.4	0.3264	18.0751
2.6	125	2016	27.8	34.1	25	2.9	0.3	22.1221
2.6	126	2016	26.9	62.8	12.1	2.9	0.1452	23.8334
2.6	127	2016	23.8	92.4	3.8	2.7	0.0456	23.4897
2.6	128	2016	27.2	79.8	13.4	1.6	0.1608	26.2663
2.6	129	2016	22.5	56.4	7.9	3.2	0.0948	18.7866
2.6	130	2016	23.8	32.3	24.9	2.1	0.2988	18.6313
2.6	131	2016	27.7	43.4	25.6	2.6	0.3072	23.1908
2.6	132	2016	27	57.5	17.5	2.9	0.21	23.6979
2.6	133	2016	22	84.6	9	3.2	0.108	21.2914
2.6	134	2016	25.7	48.5	26.4	2.7	0.3168	22.0809
2.6	135	2016	26.3	53.6	24.8	1	0.2976	23.194
2.6	136	2016	24.2	67.8	15.4	2.3	0.1848	22.1705
2.6	137	2016	22.3	72.2	7.5	2.3	0.09	20.2454
2.6	138	2016	24.2	71.3	21.2	2.4	0.2544	22.934
2.6	139	2016	25	72.3	20.5	0.6	0.246	23.8571
2.6	140	2016	24.5	72.3	26.2	1.5	0.3144	23.679
2.6	141	2016	24.5	82.4	23.5	3.3	0.282	24.5176
2.6	142	2016	26.5	64.8	23.9	3	0.2868	24.4899
2.6	143	2016	24.2	92.4	22.3	2.9	0.2676	25.2548
2.6	144	2016	27.2	61.2	18.5	4.5	0.222	24.2871
2.6	145	2016	21.8	53.6	2.8	3.3	0.0336	17.4377
2.6	146	2016	23.8	57.6	7.6	2.1	0.0912	20.123
2.6	147	2016	24.7	70.3	23.1	3.2	0.2772	23.3688
2.6	148	2016	25.2	79.8	12.1	1.6	0.1452	24.2332
2.6	149	2016	22	86.1	26	4.7	0.312	22.5219
2.6	150	2016	27	46.6	29.3	3	0.3516	23.1417
2.6	151	2016	28	46.1	25.8	2.9	0.3096	23.7654
2.6	152	2016	25	65.8	23.9	2.9	0.2868	23.2197
2.6	153	2016	20.4	62.1	9.8	1.9	0.1176	17.676
2.6	154	2016	18.3	70.9	12.5	2.4	0.15	16.7298
2.6	155	2016	17.2	72.6	6.2	2.7	0.0744	15.3267
2.6	156	2016	18.6	66.9	25.8	2.5	0.3096	17.5216
2.6	157	2016	22.7	46	24.5	1.8	0.294	19.1331
2.6	158	2016	25.4	39.8	21.9	2.5	0.2628	20.59
2.6	159	2016	26.7	47.3	27.9	2	0.3348	22.9429
2.6	160	2016	27.5	63.7	24.5	2.6	0.294	25.3434
2.6	161	2016	27	66.7	21.8	3	0.2616	25.0439
2.6	162	2016	29.8	72.1	15.2	2.7	0.1824	27.893
2.6	163	2016	30	69	7.8	3	0.0936	27.1126
2.6	164	2016	24.7	79.7	15.6	2.7	0.1872	23.9317
2.6	165	2016	29.5	67.9	9.5	3.2	0.114	26.6332
2.6	166	2016	27.9	75.6	6.8	2.9	0.0816	25.8544
2.6	167	2016	26.3	87.2	19.9	2.4	0.2388	26.6467
2.6	168	2016	22.5	95	24.6	2.9	0.2952	23.9541
2.6	169	2016	24.1	88.6	17.1	2.5	0.2052	24.4266
2.6	170	2016	26.9	70.9	6.9	2.7	0.0828	24.3734
2.6	171	2016	27.6	58.2	22	1.7	0.264	24.6857
2.6	172	2016	27.1	65.5	25.1	2.6	0.3012	25.2201
2.6	173	2016	29	67.6	27.6	2.5	0.3312	27.3841
2.6	174	2016	30.1	74.2	22	2.8	0.264	28.8898
2.6	175	2016	24.8	97.8	24.6	4	0.2952	26.5272
2.6	176	2016	27.4	88.7	13.2	3.9	0.1584	27.3585
2.6	177	2016	25.1	97.8	11.2	4.4	0.1344	25.9002
2.6	178	2016	25.1	98.7	17.7	2.9	0.2124	26.5566
2.6	179	2016	26	87.2	7.3	2.8	0.0876	25.3998
2.6	180	2016	29.6	76.5	7.9	2.4	0.0948	27.7092
2.6	181	2016	32.8	72.2	24.5	1.7	0.294	31.4082
2.6	182	2016	32.2	69.9	25	1.9	0.3	30.5564
2.6	183	2016	33.8	63.7	26.7	2.4	0.3204	31.2844
2.6	184	2016	32.7	74.9	26.1	2.5	0.3132	31.7198
2.6	185	2016	29.9	76.1	25.6	2.5	0.3072	29.1703
2.6	186	2016	32.1	71.5	25.5	3.3	0.306	30.6214
2.6	187	2016	30.4	72.9	20.1	2.9	0.2412	28.8844
2.6	188	2016	32	67.5	22.7	2.3	0.2724	29.8934
2.6	189	2016	27.4	71.6	5.3	2.1	0.0636	24.8274
2.6	190	2016	29.4	72	16	2.5	0.192	27.5707
2.6	191	2016	25.8	85.2	2.3	3.2	0.0276	24.5279
2.6	192	2016	26.1	84.2	5.2	5.3	0.0624	24.8402
2.6	193	2016	29.3	78.5	23.8	3.3	0.2856	28.7391
2.6	194	2016	23.5	95.9	21.6	3	0.2592	24.8729
2.6	195	2016	21.4	82.3	19.8	4.5	0.2376	21.1814
2.6	196	2016	22.3	81.8	16.1	3.5	0.1932	21.814
2.6	197	2016	27.8	78.4	21	2.4	0.252	27.1587
2.6	198	2016	25.7	96.4	9.3	4	0.1116	26.2298
2.6	199	2016	28.8	88.8	7.3	5.2	0.0876	28.2279
2.6	200	2016	33	74.6	21.7	4.6	0.2604	31.5814
2.6	201	2016	31.5	74.7	25	2.9	0.3	30.4629
2.6	202	2016	35.6	61.4	22.7	2.5	0.2724	32.3753
2.6	203	2016	35.5	71.4	18.7	2.6	0.2244	33.4317
2.6	204	2016	34.3	67.8	16.1	3.7	0.1932	31.5631
2.6	205	2016	31.1	74.7	16	4.5	0.192	29.4094
2.6	206	2016	31.1	75.2	3.7	3.4	0.0444	28.5709
2.6	207	2016	32	72.5	9.5	2.5	0.114	29.6082
2.6	208	2016	32.1	72.7	21.6	2.4	0.2592	30.5942
2.6	209	2016	32.4	73.3	27	2.4	0.324	31.2791
2.6	210	2016	32.6	67.5	26.7	2.2	0.3204	30.6944
2.6	211	2016	32.2	65.1	26.7	2.2	0.3204	30.0062
2.6	212	2016	32.4	66.6	27	2.3	0.324	30.4004
2.6	213	2016	32.1	66.3	26.1	3.8	0.3132	29.9454
2.6	214	2016	34.4	48.5	17.5	2.4	0.21	29.1674
2.6	215	2016	33.9	71.6	10.9	3	0.1308	31.3649
2.6	216	2016	27.3	89.1	13.1	5.7	0.1572	27.1956
2.6	217	2016	32.2	76.2	19.8	3.7	0.2376	30.9589
2.6	218	2016	32.1	76.8	25.7	2.9	0.3084	31.3508
2.6	219	2016	33.9	76.9	25.4	2.2	0.3048	33.1138
2.6	220	2016	33.8	78.1	23.5	1.9	0.282	33.0856
2.6	221	2016	33.3	79.4	25	2	0.3	32.8628
2.6	222	2016	32	80.3	22	2	0.264	31.5419
2.6	223	2016	31.6	79.3	22.3	2	0.2676	31.0431
2.6	224	2016	30.9	73.7	20.6	1.9	0.2472	29.55
2.6	225	2016	33.3	67.2	22.6	1.9	0.2712	31.0815
2.6	226	2016	34.2	68.4	20.4	2.1	0.2448	31.9338
2.6	227	2016	34.3	69.5	14	2.5	0.168	31.715
2.6	228	2016	34.2	74.2	12.6	3.2	0.1512	32.1228
2.6	229	2016	31.5	80	9.1	3.6	0.1092	30.0106
2.6	230	2016	32	78.2	22.9	3.3	0.2748	31.2485
2.6	231	2016	34.7	76.4	20.2	2.1	0.2424	33.498
2.6	232	2016	33.2	75.8	9.8	1.6	0.1176	31.2627
2.6	233	2016	33.4	70.6	17	2.3	0.204	31.244
2.6	234	2016	31.3	74.1	8	2.9	0.096	29.0088
2.6	235	2016	24.2	85.3	10.4	3.1	0.1248	23.6434
2.6	236	2016	24.9	90.4	20	2.7	0.24	25.6029
2.6	237	2016	31.6	76.1	4.3	2.2	0.0516	29.2852
2.6	238	2016	34.7	63.3	3.5	2.1	0.042	30.4136
2.6	239	2016	34	70.1	8	3.1	0.096	31.0194
2.6	240	2016	32.7	77	12.3	4.3	0.1476	30.9819
2.6	241	2016	31.3	71.8	3.1	2.7	0.0372	28.3117
2.6	242	2016	27.3	58.3	15.6	1.8	0.1872	23.993
2.6	243	2016	30.5	64.5	12.7	1.9	0.1524	27.4568
2.6	244	2016	30.5	74.2	8.5	2.3	0.102	28.335
2.6	245	2016	29.4	78.9	19.8	2.1	0.2376	28.7022
2.6	246	2016	33.8	62.9	19.5	2.3	0.234	30.7412
2.6	247	2016	28.1	69.1	17	2.6	0.204	26.0595
2.6	248	2016	21.6	86.1	2	3.4	0.024	20.4484
2.6	249	2016	21.6	89.2	5.8	5	0.0696	20.9963
2.6	250	2016	21.9	75.7	6	6.3	0.072	19.8691
2.6	251	2016	27	50.7	5	3.2	0.06	21.9321
2.6	252	2016	26.1	63.2	3.6	1.8	0.0432	22.5175
2.6	253	2016	26.6	72	2.5	2.8	0.03	23.8365
2.6	254	2016	23.8	76.3	3.4	3	0.0408	21.7168
2.6	255	2016	26.7	72.1	13.4	2.8	0.1608	24.8254
2.6	256	2016	26.4	67.6	19.1	2.7	0.2292	24.4318
2.6	257	2016	25.8	51.5	16.6	2.3	0.1992	21.9102
2.6	258	2016	25.5	66	12.2	2.4	0.1464	22.9417
2.6	259	2016	21.8	89.7	7.6	2.8	0.0912	21.5205
2.6	260	2016	25.2	99.4	3.2	3.5	0.0384	25.5755
2.6	261	2016	29.3	78.1	2.3	3.3	0.0276	27.0924
2.6	262	2016	22.2	72	2	3.5	0.024	19.5932
2.6	263	2016	21.6	72.1	2.3	3.4	0.0276	19.0684
2.6	264	2016	22.9	74.5	3.3	3.8	0.0396	20.6127
2.6	265	2016	22.8	75.1	4.7	4.6	0.0564	20.6547
2.6	266	2016	22.3	74.2	18.5	4.8	0.222	21.1255
2.6	267	2016	22.1	71.7	15.6	5	0.1872	20.4686
2.6	268	2016	18.5	71.6	11.1	4	0.1332	16.7844
2.6	269	2016	24	71.7	3.4	1.7	0.0408	21.4883
2.6	270	2016	23.8	71.6	9.9	1.7	0.1188	21.8263
2.6	271	2016	26.4	76.3	7.5	1.9	0.09	24.6156
2.6	272	2016	26.9	72.1	12.2	2.8	0.1464	24.9249
2.6	273	2016	23.3	63.3	2.3	2.6	0.0276	19.7937
2.6	274	2016	21.1	71.7	14.4	2.7	0.1728	19.5697
2.6	275	2016	24.1	81.2	10.4	2.4	0.1248	23.1432
2.6	276	2016	20.4	99.1	4.3	2.6	0.0516	20.7718
2.6	277	2016	23.1	98.2	11.8	2.6	0.1416	24.0497
2.6	278	2016	25.9	94.9	18.9	2.1	0.2268	27.0723
2.6	279	2016	28.8	65.1	16.5	2.5	0.198	26.2003
2.6	280	2016	25.8	73.8	6	2.2	0.072	23.618
2.6	281	2016	23	82.4	8.5	2.3	0.102	22.0549
2.6	282	2016	24.4	51.5	12.1	2.3	0.1452	20.344
2.6	283	2016	21.6	61.5	4.6	2.6	0.0552	18.249
2.6	284	2016	21	71.1	3.2	2.2	0.0384	18.55
2.6	285	2016	23.3	70.9	8.1	2.4	0.0972	21.0971
2.6	286	2016	23.9	74.2	16.2	2.9	0.1944	22.5989
2.6	287	2016	21.6	85.5	13.4	2.5	0.1608	21.3667
2.6	288	2016	24.2	80.8	14.3	2.2	0.1716	23.502
2.6	289	2016	26.6	85.4	9.1	3.1	0.1092	25.9145
2.6	290	2016	23.5	65.8	12.1	3.9	0.1452	20.9717
2.6	291	2016	19.9	60.6	13.7	2.6	0.1644	17.331
2.6	292	2016	21.5	65.1	10.3	2.1	0.1236	19.0122
2.6	293	2016	23	69.5	4.9	2.1	0.0588	20.42
2.6	294	2016	24.3	53.6	1.9	2.3	0.0228	19.6442
2.6	295	2016	23.2	66.3	5	2.4	0.06	20.2625
2.6	296	2016	26.7	65	2.9	2.2	0.0348	23.1929
2.6	297	2016	28.2	72.9	13.4	2.4	0.1608	26.3624
2.6	298	2016	21.7	60	13.5	2.2	0.162	18.9202
2.6	299	2016	23.9	37.9	10.8	3.9	0.1296	18.2527
2.6	300	2016	16	65	12	2.6	0.144	14.0177
2.6	301	2016	16.1	68.4	12.5	2.4	0.15	14.4463
2.6	302	2016	17.5	68.8	12.3	2.1	0.1476	15.7925
2.6	303	2016	20	61.4	8.9	3	0.1068	17.1083
2.6	304	2016	19.4	53.2	9.8	2.6	0.1176	15.8826
2.6	305	2016	20.2	36.3	3.1	2.6	0.0372	14.4101
2.6	306	2016	18.3	53.7	8.8	1.9	0.1056	14.9095
2.6	307	2016	19.6	85.9	12.9	2.1	0.1548	19.421
2.6	308	2016	19.4	80.9	12.9	2.4	0.1548	18.7364
2.6	309	2016	18.8	46.5	12.9	1.9	0.1548	15.0073
2.6	310	2016	20.9	74.4	8.6	1.8	0.1032	19.2553
2.6	311	2016	21.7	86.1	11.9	2.3	0.1428	21.4248
2.6	312	2016	16.4	69.8	11.9	2.1	0.1428	14.818
2.6	313	2016	14	77.4	11.9	2.2	0.1428	13.1541
2.6	314	2016	15.2	60.6	12	1.9	0.144	12.9581
2.6	315	2016	17.4	60.5	5.4	1.7	0.0648	14.4389
2.6	316	2016	20.5	60.6	1.5	3	0.018	16.8615
2.6	317	2016	20.4	57.2	1.5	2.1	0.018	16.4921
2.6	318	2016	15.5	60.6	0.7	2.3	0.0084	12.2698
2.6	319	2016	13.3	51.9	4	1.9	0.048	9.91468
2.6	320	2016	18.5	75.8	5.9	2.2	0.0708	16.8539
2.6	321	2016	19.1	92.3	10.6	2.2	0.1272	19.3438
2.6	322	2016	15.4	82.4	10.3	2.5	0.1236	14.7712
2.6	323	2016	14.1	73	8	1.8	0.096	12.6217
2.6	324	2016	17.1	58.7	5.2	2.1	0.0624	13.9685
2.6	325	2016	18.6	65.6	10.9	1.9	0.1308	16.4332
2.6	326	2016	17.7	39	10.6	1.9	0.1272	13.2065
2.6	327	2016	18	56.5	10.6	1.9	0.1272	15.0355
2.6	328	2016	17.5	71.6	10.5	1.9	0.126	15.9141
2.6	329	2016	13.6	60.8	10.1	2.3	0.1212	11.3453
2.6	330	2016	14.6	38.1	7.5	1.9	0.09	10.2563
2.6	331	2016	16.5	74.3	4	1.6	0.048	14.6858
2.6	332	2016	17.1	61.5	1.5	1.7	0.018	13.9138
2.6	333	2016	16.6	59.6	8.4	1.9	0.1008	13.868
2.6	334	2016	18	72.4	7.6	1.8	0.0912	16.2331
2.6	335	2016	21.6	88.8	8	2.2	0.096	21.2975
2.6	336	2016	19	85.3	8	2.5	0.096	18.3701
2.6	337	2016	10.3	80.5	6.4	2.9	0.0768	9.3307
2.6	338	2016	12.5	26.7	8.6	2.9	0.1032	7.6685
2.6	339	2016	13.6	49.5	1.7	2.3	0.0204	9.77102
2.6	340	2016	12	46.5	4.5	2.9	0.054	8.35672
2.6	341	2016	12.7	55.7	2.3	1.8	0.0276	9.52311
2.6	342	2016	16.3	47.5	10.4	2	0.1248	12.7193
2.6	343	2016	19.1	74.1	6.1	3.1	0.0732	17.2345
2.6	344	2016	18.8	93	10.2	2.7	0.1224	19.0474
2.6	345	2016	23.8	57.2	10	4.4	0.12	20.1404
2.6	346	2016	14.4	62	9.8	1.6	0.1176	12.1872
2.6	347	2016	15.2	72.3	9.8	2	0.1176	13.7396
2.6	348	2016	15.9	47.5	3.7	2	0.0444	11.8192
2.6	349	2016	17.7	72.6	4.7	2.8	0.0564	15.6681
2.6	350	2016	12	53.5	9	2.2	0.108	9.2754
2.6	351	2016	11	64.5	9.8	2.7	0.1176	9.18357
2.6	352	2016	11	92.3	9	4.2	0.108	10.9672
2.6	353	2016	12.5	80.8	10.2	2.5	0.1224	11.8159
2.6	354	2016	13.7	55.5	10.1	4.6	0.1212	10.8948
2.6	355	2016	11.7	39	8.7	2	0.1044	7.95785
2.6	356	2016	11	60.2	9.5	3.8	0.114	8.79809
2.6	357	2016	9.3	53.5	8.7	2.6	0.1044	6.82228
2.6	358	2016	9.7	52.7	9.4	3.5	0.1128	7.1304
2.6	359	2016	8.9	49	9.9	3.5	0.1188	6.22413
2.6	360	2016	6.3	53.4	8.9	2.1	0.1068	4.18762
2.6	361	2016	8.5	65.7	9	1.9	0.108	6.93237
2.6	362	2016	9.1	58.9	3.7	1.9	0.0444	6.61307
2.6	363	2016	14.1	72.3	2.2	2.7	0.0264	12.0238
2.6	364	2016	12	52.4	10.2	3.7	0.1224	9.20451
2.6	365	2016	12	55.2	7.4	2.8	0.0888	9.23516
2.6	366	2016	10.9	52.2	7.2	2.5	0.0864	8.04247
2.6	1	2017	6.9	36.4	9.1	3.4	0.1092	3.68542
2.6	2	2017	7.6	43.9	9.4	2.3	0.1128	4.80797
2.6	3	2017	10.2	48.6	7.8	2.2	0.0936	7.24552
2.6	4	2017	8.8	38	7.6	2.4	0.0912	5.32132
2.6	5	2017	10.1	55.6	1.3	2.9	0.0156	7.03056
2.6	6	2017	12.5	82.5	5.6	4	0.0672	11.4829
2.6	7	2017	14.3	85.1	8.6	4.1	0.1032	13.6859
2.6	8	2017	14.6	82.5	10.4	6.3	0.1248	13.7892
2.6	9	2017	12.8	38.9	10.6	4.2	0.1272	8.90795
2.6	10	2017	5.8	32.8	10.5	4	0.126	2.64007
2.6	11	2017	8.4	45.5	10.8	2.5	0.1296	5.69561
2.6	12	2017	10.7	43.6	10.4	1.6	0.1248	7.58173
2.6	13	2017	11.6	60.1	3.7	1.6	0.0444	8.98323
2.6	14	2017	10.6	72.7	11.1	1.6	0.1332	9.53867
2.6	15	2017	10	36.1	11.2	2.8	0.1344	6.47178
2.6	16	2017	9.2	45.6	8.8	3.2	0.1056	6.19915
2.6	17	2017	8.5	36.3	4.2	3.2	0.0504	4.63147
2.6	18	2017	8.7	37	10.7	3.1	0.1284	5.38008
2.6	19	2017	8.6	37.2	6.3	3.9	0.0756	4.90932
2.6	20	2017	6.3	49.7	10.4	4.7	0.1248	3.9506
2.6	21	2017	8.2	37.2	12	3.2	0.144	5.0646
2.6	22	2017	9.8	50.3	11.8	3	0.1416	7.27548
2.6	23	2017	9.5	39.6	10.4	2.5	0.1248	6.23492
2.6	24	2017	9.1	47.8	12.3	2.1	0.1476	6.58753
2.6	25	2017	10.1	53.1	12.3	2.2	0.1476	7.81091
2.6	26	2017	11.7	38	12.8	2.3	0.1536	8.18614
2.6	27	2017	15.9	58.2	12.9	2.4	0.1548	13.4342
2.6	28	2017	16.4	59.3	11.6	4	0.1392	13.791
2.6	29	2017	10.1	29.6	1.7	3.3	0.0204	5.30427
2.6	30	2017	9.2	40.6	11.8	2.3	0.1416	6.16304
2.6	31	2017	9.2	79.2	3.8	2.4	0.0456	7.98838
2.6	32	2017	6.8	42.2	9.7	2.8	0.1164	4.01515
2.6	33	2017	9.3	64.9	10.5	2.4	0.126	7.71155
2.6	34	2017	11.1	37.8	9.4	3.1	0.1128	7.35751
2.6	35	2017	13	53.1	9.8	2.8	0.1176	10.1654
2.6	36	2017	16.3	48.5	2.6	4.9	0.0312	11.9918
2.6	37	2017	12	37.8	8.4	3	0.1008	8.04433
2.6	38	2017	9.1	34.1	7.6	3	0.0912	5.2913
2.6	39	2017	7.1	33.9	10.6	2.2	0.1272	3.89474
2.6	40	2017	11.4	63.8	13	2.4	0.156	9.76528
2.6	41	2017	12.6	32.5	12.5	2.8	0.15	8.4884
2.6	42	2017	8.9	33.3	9.9	3	0.1188	5.25754
2.6	43	2017	12.7	74.2	4.3	2.8	0.0516	11.0181
2.6	44	2017	17.1	71.9	13.8	4.1	0.1656	15.6859
2.6	45	2017	13	48.7	13.4	2.1	0.1608	10.1482
2.6	46	2017	13.5	47.3	13.9	2.3	0.1668	10.5046
2.6	47	2017	15.2	88.6	14.3	3.1	0.1716	15.35
2.6	48	2017	18.4	54.1	11.5	5.4	0.138	15.0458
2.6	49	2017	7.7	51.5	12.8	6.8	0.1536	5.35333
2.6	50	2017	9.9	35.1	15.1	3.8	0.1812	6.55349
2.6	51	2017	9.5	34.1	14.9	3.1	0.1788	6.17905
2.6	52	2017	6.2	35.7	16.3	4.2	0.1956	3.55018
2.6	53	2017	9.1	59.2	16.2	2.7	0.1944	7.56612
2.6	54	2017	13.2	52.2	16.8	3	0.2016	10.7815
2.6	55	2017	8.8	35.3	5.7	2.8	0.0684	4.97095
2.6	56	2017	13.3	40.8	17.5	2.2	0.21	10.0951
2.6	57	2017	16.5	74	17.8	2.9	0.2136	15.65
2.6	58	2017	9.7	46.4	16.5	2.4	0.198	7.30772
2.6	59	2017	8.6	31.6	17.1	2.8	0.2052	5.44376
2.6	60	2017	8.9	38	7.4	1.8	0.0888	5.42392
2.6	61	2017	11.5	52.5	13.6	2.5	0.1632	9.094
2.6	62	2017	11.9	57.7	15.9	2.8	0.1908	9.97309
2.6	63	2017	9.9	58.8	12.9	2.8	0.1548	8.02147
2.6	64	2017	14.6	64.3	7.2	2.7	0.0864	12.2829
2.6	65	2017	17.4	79.9	16.5	3.9	0.198	16.8796
2.6	66	2017	13.8	38.6	14.1	2.3	0.1692	10.1052
2.6	67	2017	15.4	35.2	5.9	1.9	0.0708	10.5623
2.6	68	2017	18	22.5	13.8	2.7	0.1656	12.1724
2.6	69	2017	18.1	53	11.1	1.5	0.1332	14.8711
2.6	70	2017	18.7	91.1	12.4	4.2	0.1488	18.8546
2.6	71	2017	19.7	36.4	18.4	3.6	0.2208	15.1249
2.6	72	2017	12.2	45	17.3	3.7	0.2076	9.36275
2.6	73	2017	12.5	45.6	16.2	3.4	0.1944	9.60778
2.6	74	2017	16.1	45	18.8	3.1	0.2256	12.8776
2.6	75	2017	16.7	28.6	19.4	2.2	0.2328	12.0757
2.6	76	2017	14.2	87.6	19.4	3.2	0.2328	14.6252
2.6	77	2017	15.1	90.2	19.4	3.1	0.2328	15.7345
2.6	78	2017	11.9	79	18.7	3.1	0.2244	11.6851
2.6	79	2017	14.6	40.8	14.5	2.7	0.174	10.9656
2.6	80	2017	17.3	38.6	9	2.6	0.108	12.666
2.6	81	2017	15.2	33.4	20.8	2.3	0.2496	11.3258
2.6	82	2017	12	69.1	20.4	3.1	0.2448	11.1763
2.6	83	2017	15.1	51.1	16.9	2	0.2028	12.4421
2.6	84	2017	16.8	39	7.6	2.8	0.0912	12.1526
2.6	85	2017	21.7	51.6	12.7	3.6	0.1524	17.9343
2.6	86	2017	21.4	77.7	2.3	4.9	0.0276	19.3528
2.6	87	2017	18.9	98.6	6.2	2.8	0.0744	19.3381
2.6	88	2017	18.6	71.2	23	4.1	0.276	17.6581
2.6	89	2017	10.7	42.9	23.5	3.7	0.282	8.31985
2.6	90	2017	13.2	36.4	20.3	1.6	0.2436	9.89641
2.6	91	2017	15.4	56.5	10.5	2.7	0.126	12.642
2.6	92	2017	18.7	36.3	21.3	2.9	0.2556	14.5041
2.6	93	2017	20.8	46.1	21.6	2.4	0.2592	17.2795
2.6	94	2017	20.1	68.9	19.2	2.7	0.2304	18.6893
2.6	95	2017	17.7	71.8	14	2.8	0.168	16.3329
2.6	96	2017	20.8	58.7	21.5	3.7	0.258	18.4353
2.6	97	2017	20	72.7	10.1	2.9	0.1212	18.2913
2.6	98	2017	21	90	4.6	3.7	0.0552	20.4508
2.6	99	2017	14.3	67.7	11.6	3.4	0.1392	12.5831
2.6	100	2017	13.1	49.5	3.3	3.2	0.0396	9.4208
2.6	101	2017	16.4	43.5	24.1	1.7	0.2892	13.4251
2.6	102	2017	15.5	72.3	24.1	2.3	0.2892	14.9955
2.6	103	2017	16.1	73.9	21.1	2.9	0.2532	15.4786
2.6	104	2017	22.5	76.1	6.9	5.8	0.0828	20.5873
2.6	105	2017	24.9	75.4	24.4	5.2	0.2928	24.0824
2.6	106	2017	23.6	91.3	22.1	3.8	0.2652	24.471
2.6	107	2017	28.2	63.7	24.2	4.8	0.2904	25.8444
2.6	108	2017	20.9	58.2	21	2.9	0.252	18.4907
2.6	109	2017	19.9	75.4	7.6	3.9	0.0912	18.1977
2.6	110	2017	22	86.1	22.8	5.8	0.2736	22.2689
2.6	111	2017	19	94	19.1	4.5	0.2292	19.8812
2.6	112	2017	15.2	68.8	9.5	3	0.114	13.3725
2.6	113	2017	16.7	73.8	25.9	2.8	0.3108	16.337
2.6	114	2017	18.1	72.1	27	2.7	0.324	17.5824
2.6	115	2017	21.4	49.4	26.9	3	0.3228	18.4124
2.6	116	2017	20	54.7	20.6	2.4	0.2472	17.3439
2.6	117	2017	21.6	74.5	6.1	3.1	0.0732	19.6531
2.6	118	2017	24.1	70.9	27.4	3.2	0.3288	23.12
2.6	119	2017	24.2	70.3	21.6	2.5	0.2592	22.8456
2.6	120	2017	24.1	68.2	10.6	2.6	0.1272	21.7462
2.6	121	2017	19.2	72.7	19.6	3.3	0.2352	18.194
2.6	122	2017	18.7	71	25.4	3.3	0.3048	17.9229
2.6	123	2017	19.8	53.6	26	3.8	0.312	17.3087
2.6	124	2017	23.6	61.5	25.8	2.6	0.3096	21.5935
2.6	125	2017	18.6	87.8	21.5	3.8	0.258	19.1043
2.6	126	2017	21.8	66.4	4	4.5	0.048	18.7669
2.6	127	2017	19.2	70.7	5.2	3	0.0624	16.942
2.6	128	2017	18.5	61.2	19.5	1.6	0.234	16.5702
2.6	129	2017	21.3	67.9	20.2	3.9	0.2424	19.7101
2.6	130	2017	20	78.8	5.5	2.9	0.066	18.5022
2.6	131	2017	21	41.3	2.3	3.8	0.0276	15.4376
2.6	132	2017	21.4	54.6	2	3.1	0.024	17.1218
2.6	133	2017	22.7	54.6	17.5	3	0.21	19.5091
2.6	134	2017	26.2	70.6	25	4.9	0.3	24.8299
2.6	135	2017	23.3	73.7	12.5	9.6	0.15	21.3233
2.6	136	2017	21.6	60.8	6.2	3.4	0.0744	18.2678
2.6	137	2017	21.6	43.9	14.7	2.9	0.1764	17.259
2.6	138	2017	23.2	85.1	6.6	2.9	0.0792	22.3447
2.6	139	2017	28.7	71	12.6	3.1	0.1512	26.5065
2.6	140	2017	24.6	56.8	21.1	3	0.2532	21.6868
2.6	141	2017	22.3	46.7	16.1	3.3	0.1932	18.2271
2.6	142	2017	24.3	47.5	16.1	3	0.1932	20.0737
2.6	143	2017	28	55	22.2	3	0.2664	24.6045
2.6	144	2017	25.9	67.4	13.4	2.2	0.1608	23.5721
2.6	145	2017	25.2	71.5	3	2.8	0.036	22.5016
2.6	146	2017	24	87	11	5	0.132	23.5671
2.6	147	2017	25.7	73.7	25.1	3.7	0.3012	24.7824
2.6	148	2017	27	57.5	23.8	1.2	0.2856	24.2004
2.6	149	2017	26.7	64.1	27.3	2.3	0.3276	24.8307
2.6	150	2017	26.1	67.8	27.5	1.6	0.33	24.7489
2.6	151	2017	27.1	72.5	19.6	2.6	0.2352	25.6942
2.6	152	2017	27	75.6	2.7	3.6	0.0324	24.6049
2.6	153	2017	29	71.9	3.3	3.4	0.0396	26.1286
2.6	154	2017	28	75.5	7.2	3.2	0.0864	25.9538
2.6	155	2017	24	84	9.4	2.8	0.1128	23.2456
2.6	156	2017	23.5	58.4	7	2.7	0.084	19.8535
2.6	157	2017	24.9	80.5	16.3	2.1	0.1956	24.297
2.6	158	2017	29.3	72.8	23.3	2.5	0.2796	28.0537
2.6	159	2017	24.5	89.4	18.4	3.1	0.2208	24.9655
2.6	160	2017	28.9	80.1	9.8	2.5	0.1176	27.6227
2.6	161	2017	28	77.7	2.7	2.7	0.0324	25.8624
2.6	162	2017	27.7	73.7	6.8	2.9	0.0816	25.4385
2.6	163	2017	33.3	65.8	3.9	1.9	0.0468	29.5085
2.6	164	2017	30.3	76.8	21.3	2.5	0.2556	29.3805
2.6	165	2017	26.5	85	18.9	1.9	0.2268	26.5547
2.6	166	2017	33.7	72.5	12.9	3.2	0.1548	31.4385
2.6	167	2017	26.4	75.6	17.9	3	0.2148	25.25
2.6	168	2017	26.2	67.4	2.9	2.7	0.0348	22.9753
2.6	169	2017	24.5	94.3	11.2	5.8	0.1344	24.8265
2.6	170	2017	25.5	80	2.9	3.5	0.0348	23.6867
2.6	171	2017	27.2	72.1	8.8	2.9	0.1056	24.9389
2.6	172	2017	24.2	82.4	9.7	2.5	0.1164	23.3096
2.6	173	2017	26.7	79.4	13.5	1.4	0.162	25.755
2.6	174	2017	30.7	75.9	6.6	1.6	0.0792	28.6265
2.6	175	2017	32	72.5	16.6	2.4	0.1992	30.1415
2.6	176	2017	28.6	74.8	11.9	2.6	0.1428	26.8476
2.6	177	2017	25.7	88.9	21	2.7	0.252	26.2979
2.6	178	2017	26.3	83.1	18.2	3.2	0.2184	26.0198
2.6	179	2017	28.6	79.7	22.6	3.8	0.2712	28.1074
2.6	180	2017	28.1	85.2	20.4	2.9	0.2448	28.193
2.6	181	2017	27	89.1	7	3.1	0.084	26.5685
2.6	182	2017	27.1	90.9	3.3	5.1	0.0396	26.4501
2.6	183	2017	29.2	83.7	2	2.4	0.024	27.7079
2.6	184	2017	29.1	65	1.9	2.5	0.0228	25.307
2.6	185	2017	26.2	67.5	3.8	2.5	0.0456	23.0765
2.6	186	2017	26.3	66.5	24.9	3	0.2988	24.5586
2.6	187	2017	24.4	73.2	24.4	5.4	0.2928	23.3543
2.6	188	2017	31.3	73	21.8	2.1	0.2616	29.9048
2.6	189	2017	29.2	73.8	25.4	2.2	0.3048	28.2237
2.6	190	2017	27.9	76.8	27.6	1.9	0.3312	27.4864
2.6	191	2017	25.1	80.2	28	1.7	0.336	25.2103
2.6	192	2017	26.3	78.7	24.2	2.1	0.2904	25.9619
2.6	193	2017	24.6	75.7	25.5	2.4	0.306	24.0533
2.6	194	2017	31.2	66.4	26.7	1.9	0.3204	29.2653
2.6	195	2017	29.9	72.3	26.9	2.3	0.3228	28.7819
2.6	196	2017	23.3	81.2	22.8	3.4	0.2736	23.1719
2.6	197	2017	24.8	67.7	17.5	4.4	0.21	22.7459
2.6	198	2017	24.5	66.6	16.4	4	0.1968	22.293
2.6	199	2017	25.4	61.2	22.8	3.5	0.2736	22.9762
2.6	200	2017	25.6	64.9	25	2.8	0.3	23.7461
2.6	201	2017	26.8	63.6	26.9	2.3	0.3228	24.8427
2.6	202	2017	28.2	63.4	22.6	2.3	0.2712	25.8543
2.6	203	2017	29.2	66.3	21	2.4	0.252	27.0239
2.6	204	2017	27.5	72.2	20	2.6	0.24	26.0638
2.6	205	2017	23.9	74.1	10.1	3.6	0.1212	22.0957
2.6	206	2017	23.4	73.1	5.9	5.1	0.0708	21.0886
2.6	207	2017	22.9	78.4	20	7.4	0.24	22.0849
2.6	208	2017	21.8	83.6	20.8	7	0.2496	21.6247
2.6	209	2017	23.7	75.9	16	4.7	0.192	22.4728
2.6	210	2017	30.5	70.3	10.4	2	0.1248	28.0091
2.6	211	2017	33.4	63.5	11.6	2	0.1392	29.9108
2.6	212	2017	34	52.8	24.4	2.6	0.2928	29.8341
2.6	213	2017	34.5	60	21.4	2.9	0.2568	31.0721
2.6	214	2017	34.4	68.4	24.9	3.2	0.2988	32.3355
2.6	215	2017	31.6	84.3	10.6	5.2	0.1272	30.6913
2.6	216	2017	33.2	75.1	6.7	3.6	0.0804	30.8044
2.6	217	2017	37.2	63.1	15.9	2.3	0.1908	33.6484
2.6	218	2017	36.1	69.8	10.9	2.9	0.1308	33.1905
2.6	219	2017	34.4	78.3	4.2	3	0.0504	32.2143
2.6	220	2017	31.6	83.2	6.1	2.3	0.0732	30.3524
2.6	221	2017	32.3	75.8	20	1.9	0.24	31.118
2.6	222	2017	30	84.6	15.5	1.9	0.186	29.7118
2.6	223	2017	33.6	71.4	8.1	1.7	0.0972	30.9078
2.6	224	2017	33.1	70	14.8	2.4	0.1776	30.7203
2.6	225	2017	32.8	71.4	7	3.1	0.084	29.9833
2.6	226	2017	33.1	72.5	3.1	3	0.0372	30.0888
2.6	227	2017	33.4	73.2	14	2.4	0.168	31.3758
2.6	228	2017	33.4	70.8	19.3	3	0.2316	31.3864
2.6	229	2017	31.9	72.7	21.1	3.4	0.2532	30.3158
2.6	230	2017	31.5	70.6	22.4	3.4	0.2688	29.747
2.6	231	2017	30	71.1	23.5	2.8	0.282	28.4995
2.6	232	2017	29.6	69.5	22.8	2.4	0.2736	27.9045
2.6	233	2017	28	74	13.5	2.4	0.162	26.3112
2.6	234	2017	25.7	94.1	5.8	4	0.0696	25.6859
2.6	235	2017	27.8	92.5	9.9	7.5	0.1188	27.7491
2.6	236	2017	30.8	74.9	15.9	7.4	0.1908	28.976
2.6	237	2017	35.1	57.2	19.1	1.9	0.2292	31.1345
2.6	238	2017	33.9	63.2	8.1	2.2	0.0972	30.0439
2.6	239	2017	32.3	68.8	5.9	3.1	0.0708	29.0778
2.6	240	2017	32.1	67.9	21.8	4.1	0.2616	29.8801
2.6	241	2017	29.8	57.8	20.1	2.1	0.2412	26.4827
2.6	242	2017	29.7	61.4	17	2.4	0.204	26.6141
2.6	243	2017	29.4	63.9	18.9	2.9	0.2268	26.7483
2.6	244	2017	28	78.6	18.8	2.5	0.2256	27.2259
2.6	245	2017	28.8	84.8	11.1	1.1	0.1332	28.2779
2.6	246	2017	32.8	76.9	2.3	1.9	0.0276	30.3834
2.6	247	2017	32.5	75.4	3.3	2.1	0.0396	29.9734
2.6	248	2017	30.7	77.1	11.8	2.1	0.1416	29.163
2.6	249	2017	29.2	95.8	16.6	2.2	0.1992	30.3603
2.6	250	2017	32.8	80.7	22.4	3.3	0.2688	32.3213
2.6	251	2017	32.2	64.1	21.8	3.3	0.2616	29.5198
2.6	252	2017	27.9	41.1	21.6	2.9	0.2592	22.8308
2.6	253	2017	25.7	65.5	17.5	2.9	0.21	23.4237
2.6	254	2017	27.6	72.2	8.7	2.8	0.1044	25.3266
2.6	255	2017	29.2	76.7	16.8	2.2	0.2016	28.0313
2.6	256	2017	32.4	79.3	14	2.5	0.168	31.2266
2.6	257	2017	26.4	100	11	2.8	0.132	27.5549
2.6	258	2017	26.5	90	10.2	3.2	0.1224	26.425
2.6	259	2017	22.2	71.6	11.1	3.4	0.1332	20.3118
2.6	260	2017	24.3	71.6	14.2	3.4	0.1704	22.5263
2.6	261	2017	25.4	71.2	13	2.9	0.156	23.4604
2.6	262	2017	24.2	71.9	11.4	2.8	0.1368	22.2896
2.6	263	2017	25.7	74.5	15	2.7	0.18	24.2719
2.6	264	2017	24.8	76.4	2.7	3.1	0.0324	22.6187
2.6	265	2017	24.9	74	2.3	3.5	0.0276	22.3921
2.6	266	2017	25.6	71.8	0.8	2.7	0.0096	22.7228
2.6	267	2017	25.6	62	3.1	2.9	0.0372	21.8167
2.6	268	2017	23.4	57	14.4	2.2	0.1728	20.2161
2.6	269	2017	27.8	73.6	18.6	3.9	0.2232	26.3467
2.6	270	2017	28.5	71.7	17.5	2.8	0.21	26.7708
2.6	271	2017	23.4	72.2	4.5	2.8	0.054	21.0065
2.6	272	2017	23.2	66.3	2.5	3.1	0.03	20.0062
2.6	273	2017	18.3	74.2	17.2	2.9	0.2064	17.3391
2.6	274	2017	23.5	72.2	19	2.6	0.228	22.2147
2.6	275	2017	22.3	85.7	13.8	2.2	0.1656	22.123
2.6	276	2017	26	75.2	7.9	2.1	0.0948	24.1289
2.6	277	2017	26.3	49	18.3	2.5	0.2196	22.1725
2.6	278	2017	23.1	65	13.7	3.5	0.1644	20.6591
2.6	279	2017	19.7	59.1	13.9	2.2	0.1668	17.0437
2.6	280	2017	21.5	70.3	11.9	2.3	0.1428	19.6447
2.6	281	2017	25.7	70.3	16.8	2.1	0.2016	23.961
2.6	282	2017	26.3	95.1	17.2	3.5	0.2064	27.3048
2.6	283	2017	23.8	97.9	17.1	2.3	0.2052	25.1341
2.6	284	2017	18.5	92.1	16.4	2.1	0.1968	19.1561
2.6	285	2017	19.6	61.9	15.2	3	0.1824	17.2662
2.6	286	2017	20	60.1	15.3	2.4	0.1836	17.5015
2.6	287	2017	20.9	50.5	11	2.4	0.132	17.0571
2.6	288	2017	20	60	15.3	2.1	0.1836	17.5091
2.6	289	2017	22.1	72.3	14.1	2.9	0.1692	20.542
2.6	290	2017	23.1	86.4	13.4	3.2	0.1608	22.898
2.6	291	2017	19.8	59.2	4.1	2.2	0.0492	16.3638
2.6	292	2017	20.6	33.5	13.9	2.1	0.1668	15.3689
2.6	293	2017	20.2	66.7	14.7	2.6	0.1764	18.2653
2.6	294	2017	20.1	57.4	14.8	2.4	0.1776	17.2973
2.6	295	2017	21.2	64.6	13.8	2.2	0.1656	18.9439
2.6	296	2017	20.2	66.9	13.6	2.6	0.1632	18.2044
2.6	297	2017	20	63.6	12.1	2.4	0.1452	17.6018
2.6	298	2017	21	59.8	6.2	2.1	0.0744	17.696
2.6	299	2017	22.7	62.6	8.8	2.1	0.1056	19.7447
2.6	300	2017	21.7	78.1	3.5	2.1	0.042	19.947
2.6	301	2017	22.2	89.2	12	2.6	0.144	22.2253
2.6	302	2017	20.7	99.6	11.6	3.5	0.1392	21.6678
2.6	303	2017	23	85.2	9.1	2.5	0.1092	22.3842
2.6	304	2017	18.1	62.6	10.6	2.8	0.1272	15.6245
2.6	305	2017	18	69.3	13.9	1.9	0.1668	16.4356
2.6	306	2017	17.9	92.9	13.4	2.5	0.1608	18.387
2.6	307	2017	20.7	49.8	13.9	1.9	0.1668	17.0585
2.6	308	2017	19.5	54.7	13.2	1.8	0.1584	16.4184
2.6	309	2017	20.7	75.5	11.3	1.9	0.1356	19.3784
2.6	310	2017	21.1	90.7	1.3	2.1	0.0156	20.4225
2.6	311	2017	21.9	97.4	6.7	2.1	0.0804	22.3668
2.6	312	2017	26.7	41.6	6.2	2.4	0.0744	20.764
2.6	313	2017	18.8	31.5	0.7	2	0.0084	12.6106
2.6	314	2017	20.4	45.5	6.3	1.7	0.0756	15.7948
2.6	315	2017	20.7	42.7	7.8	1.5	0.0936	15.9159
2.6	316	2017	21.6	39.9	12.1	1.9	0.1452	16.7224
2.6	317	2017	19.9	75.5	11.7	2	0.1404	18.6388
2.6	318	2017	20.5	59.6	10.9	1.9	0.1308	17.6101
2.6	319	2017	20.5	73.6	2.5	1.9	0.03	18.2776
2.6	320	2017	18	90	0.9	2.5	0.0108	17.2012
2.6	321	2017	18.4	58.7	7.8	3	0.0936	15.3108
2.6	322	2017	12.9	66.8	0.6	3	0.0072	10.3151
2.6	323	2017	13.7	69.8	7.2	2.3	0.0864	11.901
2.6	324	2017	16.5	69.7	10.4	2.1	0.1248	14.7882
2.6	325	2017	16.7	62.7	5.9	1.7	0.0708	14.0323
2.6	326	2017	17	62.6	1	1.3	0.012	13.8961
2.6	327	2017	18.1	60.9	1.5	1.8	0.018	14.7686
2.6	328	2017	17.7	57.6	9.7	2.8	0.1164	14.7417
2.6	329	2017	11.9	60.4	8.7	1.9	0.1044	9.67731
2.6	330	2017	16	47	5.3	2.1	0.0636	11.9957
2.6	331	2017	18.2	61.6	5.7	2.2	0.0684	15.2645
2.6	332	2017	14.6	51.9	6.7	1.9	0.0804	11.2951
2.6	333	2017	12.6	59.2	1.9	2.2	0.0228	9.63467
2.6	334	2017	13.7	71	8.5	1.9	0.102	12.1222
2.6	335	2017	15	44.9	5.7	1.7	0.0684	11.0095
2.6	336	2017	16.3	52	0.8	3.3	0.0096	12.2203
2.6	337	2017	13	58.4	3.1	1.8	0.0372	10.0662
2.6	338	2017	14.6	27.7	5	1.7	0.06	9.22738
2.6	339	2017	15.8	43.9	11.3	1.5	0.1356	12.0798
2.6	340	2017	14.6	75.9	10.1	2.6	0.1212	13.4492
2.6	341	2017	14.5	48.5	3	2.2	0.036	10.6034
2.6	342	2017	13.6	65.1	10.7	1.8	0.1284	11.7522
2.6	343	2017	14.4	68.6	10.9	1.5	0.1308	12.8029
2.6	344	2017	16.3	83.3	10.2	2.7	0.1224	15.7065
2.6	345	2017	15.9	40.9	8.6	2.7	0.1032	11.6344
2.6	346	2017	14.1	63.1	9.4	1.7	0.1128	11.9616
2.6	347	2017	11.6	82.6	10.3	2.5	0.1236	11.0782
2.6	348	2017	11.3	56.7	10.3	3.5	0.1236	8.90484
2.6	349	2017	9.4	38.9	7.1	2.4	0.0852	5.84637
2.6	350	2017	13.2	67.1	8.5	4.9	0.102	11.1833
2.6	351	2017	10.5	50.4	8.9	3.5	0.1068	7.64525
2.6	352	2017	14.2	63.7	8.7	4.2	0.1044	11.9022
2.6	353	2017	13.2	57.5	7.9	2.7	0.0948	10.5317
2.6	354	2017	11.2	43.1	6.9	2.8	0.0828	7.62893
2.6	355	2017	12.7	40.2	8.8	2.2	0.1056	8.89267
2.6	356	2017	12	80	10	1.8	0.12	11.2969
2.6	357	2017	13.2	60.2	9.7	1.7	0.1164	10.9377
2.6	358	2017	13.5	52.3	2.2	3.5	0.0264	9.87395
2.6	359	2017	8.9	43.8	0.8	4.3	0.0096	5.08066
2.6	360	2017	8	60.9	5.8	2.8	0.0696	5.86433
2.6	361	2017	8.5	47.4	3.5	2.5	0.042	5.30169
2.6	362	2017	8.6	45.5	2.2	1.9	0.0264	5.19058
2.6	363	2017	8.6	51.1	4.7	1.9	0.0564	5.7579
2.6	364	2017	16.8	76.4	1.2	5	0.0144	14.712
2.6	365	2017	11.3	44.6	3.6	6.5	0.0432	7.33
2.6	1	2018	8.7	42.7	4.3	3.7	0.0516	5.1816
2.6	2	2018	11	65.2	6.6	2.2	0.0792	9.0027
2.6	3	2018	15.7	86.4	2.8	2.9	0.0336	14.7528
2.6	4	2018	10.4	34.8	9.8	5	0.1176	6.4853
2.6	5	2018	4.3	51.8	10.1	5	0.1212	2.2547
2.6	6	2018	5.1	51.2	8.6	4.7	0.1032	2.83076
2.6	7	2018	6.3	47.6	2.6	4.9	0.0312	3.17539
2.6	8	2018	5	57	9.6	4.8	0.1152	3.11767
2.6	9	2018	7.1	48.6	6.1	3.2	0.0732	4.32997
2.6	10	2018	8.6	48.8	9.8	2.7	0.1176	5.98612
2.6	11	2018	9.5	45.5	10.7	3	0.1284	6.61392
2.6	12	2018	9.2	43.8	10.6	3	0.1272	6.23657
2.6	13	2018	9.5	37.2	10.6	2.9	0.1272	6.07123
2.6	14	2018	8.4	42.9	7.3	3	0.0876	5.22757
2.6	15	2018	8.2	48.5	2.2	2.5	0.0264	4.99315
2.6	16	2018	9.1	29.6	10.5	1.9	0.126	5.29704
2.6	17	2018	8.9	37.7	11.4	2.7	0.1368	5.66979
2.6	18	2018	8.5	46.5	11.6	3	0.1392	5.8774
2.6	19	2018	10.7	43.7	11.3	2.8	0.1356	7.58943
2.6	20	2018	9.6	55.3	11.5	2.5	0.138	7.43203
2.6	21	2018	9	41.9	11.9	2.8	0.1428	6.0541
2.6	22	2018	7.8	43.7	11.5	2.3	0.138	5.13177
2.6	23	2018	8.3	49.5	11.9	2.5	0.1428	5.93955
2.6	24	2018	6.4	51.6	11.4	3.1	0.1368	4.31382
2.6	25	2018	7.8	43.5	8.1	2.5	0.0972	4.84117
2.6	26	2018	6.6	48.5	12.6	4	0.1512	4.35461
2.6	27	2018	8.4	51.5	9.9	3.3	0.1188	5.95135
2.6	28	2018	8.4	51.7	13.5	3	0.162	6.25476
2.6	29	2018	6.6	43.8	12.9	4.1	0.1548	4.10494
2.6	30	2018	5.9	30.7	12.3	2.5	0.1476	2.83187
2.6	31	2018	7.1	34.9	7.4	2.3	0.0888	3.69238
2.6	32	2018	9	60	3.1	3.1	0.0372	6.4716
2.6	33	2018	11.1	62.5	10.7	2.5	0.1284	9.2179
2.6	34	2018	10.9	59.4	11.7	2.5	0.1404	8.89652
2.6	35	2018	10.7	66	10.9	2.3	0.1308	9.11805
2.6	36	2018	11.5	41.2	12.3	3.6	0.1476	8.13224
2.6	37	2018	4.4	41.3	10.5	2.9	0.126	1.96701
2.6	38	2018	6.1	55.4	11.5	2	0.138	4.32848
2.6	39	2018	8.6	76	10.3	4.9	0.1236	7.59972
2.6	40	2018	4.8	42.1	5.5	4.5	0.066	1.85422
2.6	41	2018	10	57.9	1	2.7	0.012	7.07847
2.6	42	2018	13.9	63.1	5.5	2.8	0.066	11.3964
2.6	43	2018	9.7	57.1	14.2	4.9	0.1704	7.70402
2.6	44	2018	11.6	61.1	13.8	2.6	0.1656	9.80474
2.6	45	2018	10	74.1	13	2.2	0.156	9.17288
2.6	46	2018	10	56.9	14.7	2.7	0.1764	8.12329
2.6	47	2018	8.3	49.4	14.7	2.8	0.1764	6.12335
2.6	48	2018	15.1	80.4	9.1	5.2	0.1092	14.0667
2.6	49	2018	10.6	43.7	4.5	5.9	0.054	6.77464
2.6	50	2018	8.5	57.1	15.8	5.5	0.1896	6.70241
2.6	51	2018	11.6	61.3	16.3	4.5	0.1956	9.8895
2.6	52	2018	11.6	62.4	16.1	4	0.1932	9.98247
2.6	53	2018	12.9	67.4	6.7	2.6	0.0804	10.9115
2.6	54	2018	12.3	55.6	2.9	2.7	0.0348	9.15805
2.6	55	2018	12.4	45.7	17.1	2.5	0.2052	9.64242
2.6	56	2018	13.3	33.3	15	1.9	0.18	9.36525
2.6	57	2018	14.6	42.2	2.1	4.6	0.0252	9.97034
2.6	58	2018	12.5	56.2	2.5	3.6	0.03	9.29523
2.6	59	2018	11.9	52.3	18.1	2	0.2172	9.78131
2.6	60	2018	11.2	79.6	11.8	2.9	0.1416	10.5699
2.6	61	2018	10.1	83	8.2	2.8	0.0984	9.45696
2.6	62	2018	13.8	51	11.6	1.8	0.1392	10.9108
2.6	63	2018	17.1	86.7	11.7	3.1	0.1404	16.8787
2.6	64	2018	15.6	56.4	10.1	2.9	0.1212	12.7711
2.6	65	2018	11.9	45.4	16.7	2.9	0.2004	9.13598
2.6	66	2018	10.3	49	10.9	2.4	0.1308	7.59415
2.6	67	2018	13.8	36.3	4.8	1.8	0.0576	9.22014
2.6	68	2018	15	39	7.6	1.7	0.0912	10.6875
2.6	69	2018	16.5	72.6	17.4	2.3	0.2088	15.5372
2.6	70	2018	18.5	61.7	16.7	2.3	0.2004	16.3864
2.6	71	2018	16.1	40.8	4.7	3.7	0.0564	11.4171
2.6	72	2018	5.8	39.6	18.5	4.2	0.222	3.5773
2.6	73	2018	11.1	49.9	17.8	2.4	0.2136	8.86034
2.6	74	2018	12.7	67.1	7.2	2.1	0.0864	10.7725
2.6	75	2018	12.8	55.3	5.3	3.8	0.0636	9.72789
2.6	76	2018	8.7	60.1	19.6	4.4	0.2352	7.39324
2.6	77	2018	13.1	47.6	12.7	2.9	0.1524	10.055
2.6	78	2018	14.4	44	20.1	2.7	0.2412	11.4339
2.6	79	2018	17.4	70.4	20.3	2.8	0.2436	16.3603
2.6	80	2018	19.6	78.7	18	6.1	0.216	18.8737
2.6	81	2018	11.1	48	3.1	4.9	0.0372	7.44232
2.6	82	2018	12.5	45.1	20.5	2.7	0.246	9.90045
2.6	83	2018	8.8	61.7	18.7	3.4	0.2244	7.58278
2.6	84	2018	11.6	57.8	1.9	3.4	0.0228	8.55839
2.6	85	2018	16.3	59.8	9.6	2.7	0.1152	13.6621
2.6	86	2018	19.4	41.1	5.8	4.7	0.0696	14.2997
2.6	87	2018	13.2	66.8	5.5	4.7	0.066	10.9252
2.6	88	2018	13.6	68	20	1.9	0.24	12.633
2.6	89	2018	15.1	90.3	21.5	3	0.258	15.884
2.6	90	2018	19.5	90.4	6.1	3.8	0.0732	19.1128
2.6	91	2018	19.1	68.3	6.7	2.9	0.0804	16.7554
2.6	92	2018	14	53.6	19.3	3.8	0.2316	11.7246
2.6	93	2018	14.6	56.8	21.3	2.9	0.2556	12.6966
2.6	94	2018	19.4	43.6	19.3	2.9	0.2316	15.6497
2.6	95	2018	21.3	64.8	3.3	3	0.0396	18.1683
2.6	96	2018	20.6	81.6	19.5	5	0.234	20.2846
2.6	97	2018	24.3	62.9	20	4.2	0.24	21.9379
2.6	98	2018	21.4	27.6	17.9	2.8	0.2148	15.6881
2.6	99	2018	17.6	71.3	23	3.8	0.276	16.7412
2.6	100	2018	20.9	80.6	20.6	5.3	0.2472	20.5326
2.6	101	2018	18.5	43.6	12.7	2.5	0.1524	14.4317
2.6	102	2018	17.6	71.2	3	2.9	0.036	15.2965
2.6	103	2018	20	66.9	21.6	2.8	0.2592	18.5535
2.6	104	2018	17.6	43.7	16	2.3	0.192	13.9155
2.6	105	2018	18.1	36.3	24.7	2.6	0.2964	14.2249
2.6	106	2018	19.7	36.4	19.2	3	0.2304	15.2126
2.6	107	2018	16.9	49.6	1.7	2.4	0.0204	12.6765
2.6	108	2018	18.5	30.6	4.1	2.3	0.0492	12.5632
2.6	109	2018	21.2	40.1	25.6	1.9	0.3072	17.3019
2.6	110	2018	21.5	59.4	25.7	2.4	0.3084	19.4682
2.6	111	2018	17.1	61.7	24.2	2.9	0.2904	15.5553
2.6	112	2018	19.5	55.1	25.1	1.8	0.3012	17.2451
2.6	113	2018	17.5	75.2	24.8	3	0.2976	17.1459
2.6	114	2018	22.3	97.4	25.3	3.5	0.3036	24.0045
2.6	115	2018	25.6	64.3	17.6	2.9	0.2112	23.2034
2.6	116	2018	22.2	68.4	1.8	2.8	0.0216	19.2474
2.6	117	2018	22.4	70.5	5.7	3.9	0.0684	19.9247
2.6	118	2018	18.5	71.4	25.9	4.2	0.3108	17.7484
2.6	119	2018	21.8	52.8	25.4	3.3	0.3048	19.0049
2.6	120	2018	21.3	72.2	25.8	5.7	0.3096	20.3783
2.6	121	2018	14.7	60.7	18.7	7.2	0.2244	12.6846
2.6	122	2018	18.1	50.3	4.1	3.5	0.0492	13.9428
2.6	123	2018	16.4	63.5	6.1	3.2	0.0732	13.756
2.6	124	2018	16.2	61.4	25.5	3.6	0.306	14.7426
2.6	125	2018	20.8	59.1	19.7	2.9	0.2364	18.4044
2.6	126	2018	21.2	67.3	5.1	4.5	0.0612	18.393
2.6	127	2018	18.8	50.4	20.1	2.5	0.2412	15.8353
2.6	128	2018	20	33.6	24.8	2.9	0.2976	15.5528
2.6	129	2018	26.8	38.5	22.3	2.9	0.2676	21.6334
2.6	130	2018	25.3	64.8	12.5	2.7	0.15	22.6281
2.6	131	2018	21.8	70.4	9.2	2.1	0.1104	19.7388
2.6	132	2018	23.2	70.9	5.9	2.6	0.0708	20.8106
2.6	133	2018	25.1	67.9	24.8	3.4	0.2976	23.5698
2.6	134	2018	25.2	66.5	16.8	4.5	0.2016	22.9318
2.6	135	2018	22.8	75.5	26.1	3.9	0.3132	22.2604
2.6	136	2018	25.8	73.9	27.3	3	0.3276	25.0655
2.6	137	2018	27.7	71.1	28.4	3.1	0.3408	26.5955
2.6	138	2018	25.2	71	22.1	4.5	0.2652	23.7805
2.6	139	2018	25.5	71	9.9	4.9	0.1188	23.1811
2.6	140	2018	23.6	86.1	17.3	4.7	0.2076	23.5519
2.6	141	2018	21	68.1	19.9	3	0.2388	19.4818
2.6	142	2018	25.6	31.6	28	2.3	0.336	20.21
2.6	143	2018	28.5	36.8	27.6	1.9	0.3312	23.2372
2.6	144	2018	26.3	60.9	25.4	2.8	0.3048	23.9598
2.6	145	2018	25	94.5	14.6	4.1	0.1752	25.7043
2.6	146	2018	29.8	63.5	4.5	3	0.054	25.966
2.6	147	2018	25.7	71	5.8	2.4	0.0696	23.18
2.6	148	2018	25.1	71.3	23	2.8	0.276	23.8724
2.6	149	2018	27.8	79.7	11.8	3	0.1416	26.6354
2.6	150	2018	22.6	83.6	20.2	2.6	0.2424	22.6209
2.6	151	2018	27	84.3	17.5	2.6	0.21	26.8303
2.6	152	2018	27.6	78.9	28.7	2.7	0.3444	27.4606
2.6	153	2018	24.9	77.8	22.8	2.5	0.2736	24.4043
2.6	154	2018	27.5	75.6	9.8	2.5	0.1176	25.7366
2.6	155	2018	25	71.5	6.7	2.6	0.0804	22.639
2.6	156	2018	25.3	70.7	23	2.7	0.276	24
2.6	157	2018	27.4	66.2	15.8	2.5	0.1896	24.9852
2.6	158	2018	27	70.8	2.7	1.9	0.0324	24.1442
2.6	159	2018	20	95.1	3.1	2.9	0.0372	19.8578
2.6	160	2018	22.8	91.4	7	5.2	0.084	22.5078
2.6	161	2018	25.5	63.6	13.2	3.2	0.1584	22.7023
2.6	162	2018	29	56.4	5.6	2.2	0.0672	24.5019
2.6	163	2018	28.2	70.7	10.5	1.9	0.126	25.9079
2.6	164	2018	25.7	76	22	2.1	0.264	24.9449
2.6	165	2018	26.5	72.7	24.2	2	0.2904	25.4719
2.6	166	2018	26.8	70.9	20.5	2.5	0.246	25.2895
2.6	167	2018	23.7	81.8	8.7	3.5	0.1044	22.6213
2.6	168	2018	28.7	62.1	12.1	2.9	0.1452	25.4016
2.6	169	2018	31	64.6	21.1	2.8	0.2532	28.4615
2.6	170	2018	28.4	71.2	23.4	2.8	0.2808	26.9973
2.6	171	2018	27	75.8	13.5	2.5	0.162	25.5637
2.6	172	2018	27.8	74.6	10.2	2.5	0.1224	25.9361
2.6	173	2018	30.5	63.5	3.8	2.5	0.0456	26.5787
2.6	174	2018	30.7	72.6	2.3	2.7	0.0276	27.7763
2.6	175	2018	26.3	79.5	4.7	2.4	0.0564	24.623
2.6	176	2018	28.3	72.5	24.2	1.5	0.2904	27.1816
2.6	177	2018	31.7	73.9	15.9	2.5	0.1908	29.9846
2.6	178	2018	24.4	92.9	14.8	2.5	0.1776	25.0298
2.6	179	2018	26.3	89.5	9.3	2.5	0.1116	26.1376
2.6	180	2018	23.4	79.5	2.5	2.5	0.03	21.6218
2.6	181	2018	24.7	77.1	3	2.5	0.036	22.6602
2.6	182	2018	24.2	81.3	2.4	3.3	0.0288	22.5355
2.6	183	2018	30.5	74.3	3.6	2.3	0.0432	27.9386
2.6	184	2018	33.3	60.5	14.6	2	0.1752	29.6375
2.6	185	2018	31.7	69.7	17.5	2.3	0.21	29.5615
2.6	186	2018	31.8	69.3	5.1	1.6	0.0612	28.6934
2.6	187	2018	33.5	61.2	1.7	2.6	0.0204	28.8388
2.6	188	2018	35	56	2	2.3	0.024	29.5273
2.6	189	2018	32.7	59.4	3.2	2.3	0.0384	28.0181
2.6	190	2018	35.1	64.9	14.8	3.5	0.1776	31.8227
2.6	191	2018	35.2	70.4	9.6	2.7	0.1152	32.3397
2.6	192	2018	33.9	73.9	17.9	3.2	0.2148	32.1748
2.6	193	2018	33.6	73.2	11.4	3.5	0.1368	31.3083
2.6	194	2018	34.3	69.9	15.8	3	0.1896	31.8708
2.6	195	2018	35.8	63.6	12.2	2.3	0.1464	32.1623
2.6	196	2018	35.1	70.4	7.1	1.7	0.0852	32.1017
2.6	197	2018	33.9	70.2	11.3	2.2	0.1356	31.2504
2.6	198	2018	34	66.6	22.8	2.8	0.2736	31.6122
2.6	199	2018	33.8	73.2	21.6	2.8	0.2592	32.2498
2.6	200	2018	32.1	77.3	16.8	2.1	0.2016	30.8967
2.6	201	2018	32	71.6	4.4	2	0.0528	29.0993
2.6	202	2018	31.6	72.2	10.8	2.3	0.1296	29.3036
2.6	203	2018	32	74	4.2	2.3	0.0504	29.379
2.6	204	2018	31.2	78.3	12.4	2.2	0.1488	29.8368
2.6	205	2018	32.1	71.1	12	2.5	0.144	29.7126
2.6	206	2018	32.8	72.2	18.8	2.6	0.2256	30.9975
2.6	207	2018	33.4	71.7	11.4	2.3	0.1368	30.9848
2.6	208	2018	33	67.7	11.2	2.3	0.1344	30.0567
2.6	209	2018	32.4	70.5	18.5	2.3	0.222	30.3918
2.6	210	2018	31.5	71.7	16.6	2.4	0.1992	29.5646
2.6	211	2018	29.1	73.2	3.1	2.3	0.0372	26.4277
2.6	212	2018	30.2	72.2	7.9	2.5	0.0948	27.7385
2.6	213	2018	29.2	70.6	6.6	2.6	0.0792	26.4842
2.6	214	2018	30.5	69.4	6.2	2.3	0.0744	27.5399
2.6	215	2018	31.5	68.3	4.5	2.3	0.054	28.1917
2.6	216	2018	32.2	68.3	6.6	2.8	0.0792	28.9939
2.6	217	2018	30.6	80.1	17.2	2.3	0.2064	29.8267
2.6	218	2018	32.1	74.2	16.9	2.5	0.2028	30.4742
2.6	219	2018	32.9	65.9	12.2	3	0.1464	29.7592
2.6	220	2018	33.3	67	17.1	3.1	0.2052	30.6263
2.6	221	2018	34.3	63.7	20	2.6	0.24	31.3262
2.6	222	2018	33.5	73	12.6	1.8	0.1512	31.3744
2.6	223	2018	31.5	80.7	22.2	1.9	0.2664	31.1271
2.6	224	2018	32.2	79.8	23.6	1.9	0.2832	31.7742
2.6	225	2018	33.3	72.6	15.6	2.1	0.1872	31.3325
2.6	226	2018	33.5	73.8	3.6	2.2	0.0432	30.7325
2.6	227	2018	32.8	79.4	4.2	3	0.0504	30.819
2.6	228	2018	27.5	93.4	3	3.5	0.036	27.2099
2.6	229	2018	28.9	86.1	10.5	3	0.126	28.3795
2.6	230	2018	30.9	74.9	10.7	2.7	0.1284	28.9555
2.6	231	2018	32.2	68.4	10	2.7	0.12	29.2866
2.6	232	2018	32.2	67.2	12.5	3.3	0.15	29.2863
2.6	233	2018	31.9	69	12.7	5.4	0.1524	29.1367
2.6	234	2018	26.2	98.7	17.8	5.7	0.2136	27.5288
2.6	235	2018	26.4	99.3	4.2	5.5	0.0504	26.7665
2.6	236	2018	25.6	87	4.3	3.8	0.0516	24.6729
2.6	237	2018	29.8	72.4	15.7	2.6	0.1884	27.9717
2.6	238	2018	30.4	69.5	17.1	2.3	0.2052	28.2887
2.6	239	2018	31.2	67.1	8.2	2.3	0.0984	28.0646
2.6	240	2018	32	65.8	7.4	2.1	0.0888	28.5858
2.6	241	2018	32.3	66.4	19.5	1.9	0.234	29.8471
2.6	242	2018	33.8	66.8	18.4	1.9	0.2208	31.2216
2.6	243	2018	32.9	63.2	15.2	2.5	0.1824	29.6478
2.6	244	2018	30.9	74.3	23.6	2.9	0.2832	29.7566
2.6	245	2018	29.5	76.2	18.5	2.9	0.222	28.3332
2.6	246	2018	28.7	78.4	6.7	2.9	0.0804	26.9501
2.6	247	2018	27.8	81.2	6.5	2.8	0.078	26.4038
2.6	248	2018	25.5	95.9	1.4	2.4	0.0168	25.3953
2.6	249	2018	27.5	95.8	2.2	3.1	0.0264	27.4448
2.6	250	2018	27.8	98.3	16.7	3.3	0.2004	29.1801
2.6	251	2018	31.9	87.2	18.6	2.8	0.2232	32.0797
2.6	252	2018	29.6	88.5	17.3	2.7	0.2076	29.882
2.6	253	2018	29.3	89.8	10.4	2.3	0.1248	29.2613
2.6	254	2018	29.7	88.3	6.6	1.8	0.0792	29.1975
2.6	255	2018	28.5	82.6	3.1	2.3	0.0372	26.9923
2.6	256	2018	28.9	80.4	19.1	2.1	0.2292	28.356
2.6	257	2018	28.2	90.2	17.6	2.4	0.2112	28.7325
2.6	258	2018	28.6	92.7	10.6	2	0.1272	28.9465
2.6	259	2018	28.8	90.3	1.3	1.6	0.0156	28.1013
2.6	260	2018	25.9	86.9	2.2	1.9	0.0264	24.8839
2.6	261	2018	29.9	75.9	9	2.1	0.108	28.0274
2.6	262	2018	30	71.9	11.5	2.1	0.138	27.818
2.6	263	2018	31.3	71.6	15.9	2.3	0.1908	29.3195
2.6	264	2018	29.9	74.5	19.8	3.1	0.2376	28.5789
2.6	265	2018	32	79.8	16.5	3.6	0.198	31.021
2.6	266	2018	28.6	100	13.5	4.9	0.162	29.8826
2.6	267	2018	29.7	96.7	3.7	3.3	0.0444	29.9088
2.6	268	2018	27.2	75.4	5.2	3.1	0.0624	25.0169
2.6	269	2018	27.3	74.7	1.6	2.8	0.0192	24.7345
2.6	270	2018	27.1	87	2.2	2.5	0.0264	26.0477
2.6	271	2018	23	71	11.6	3.6	0.1392	21.0311
2.6	272	2018	24.2	75.4	1.1	2.9	0.0132	21.8049
2.6	273	2018	26.4	58	5.4	2.5	0.0648	22.3119
2.6	274	2018	27.1	55.6	2.7	2.2	0.0324	22.4499
2.6	275	2018	25.3	74.2	4.9	2.2	0.0588	23.0946
2.6	276	2018	28.2	80.2	6.2	3.8	0.0744	26.5907
2.6	277	2018	27.5	64.6	0.9	2.8	0.0108	23.6735
2.6	278	2018	23.5	69.3	0.9	2.5	0.0108	20.4944
2.6	279	2018	24.9	79.4	1.8	2.5	0.0216	22.9995
2.6	280	2018	27.1	40.5	12.4	2.2	0.1488	21.481
2.6	281	2018	25.1	63.1	10.9	2.2	0.1308	22.1619
2.6	282	2018	23.1	66	15.2	3	0.1824	20.9012
2.6	283	2018	22.2	59.5	17.8	3.4	0.2136	19.5604
2.6	284	2018	22.7	54.3	15.9	2.5	0.1908	19.3954
2.6	285	2018	23.7	66.2	14.9	2.2	0.1788	21.5034
2.6	286	2018	23.6	53	14.7	2.5	0.1764	19.9757
2.6	287	2018	22.5	58	14.9	2.6	0.1788	19.5212
2.6	288	2018	22.2	63.7	11.4	3.8	0.1368	19.5043
2.6	289	2018	20	53.5	14.8	3.2	0.1776	16.7877
2.6	290	2018	21.1	75.2	14.9	2.6	0.1788	19.9581
2.6	291	2018	23.1	78.7	8.1	2.2	0.0972	21.738
2.6	292	2018	23.3	75.1	15	2.5	0.18	22.0605
2.6	293	2018	21.2	59	14.6	2.1	0.1752	18.4518
2.6	294	2018	20.2	63.8	8.6	2.6	0.1032	17.5213
2.6	295	2018	20	63.7	11	2.2	0.132	17.5389
2.6	296	2018	21.5	69.4	13.1	1.7	0.1572	19.6788
2.6	297	2018	23.2	67.6	10.2	2	0.1224	20.8456
2.6	298	2018	24.2	70.3	13.4	2.3	0.1608	22.2956
2.6	299	2018	26	74.1	12.4	2.2	0.1488	24.35
2.6	300	2018	23.6	84.1	11.8	2.8	0.1416	23.0502
2.6	301	2018	23.2	97.1	6.9	2.4	0.0828	23.6598
2.6	302	2018	26	84.9	1.2	2.6	0.0144	24.6269
2.6	303	2018	22.6	88.2	5	2.6	0.06	21.9582
2.6	304	2018	23.7	70.9	7.7	3.1	0.0924	21.4015
2.6	305	2018	17.4	73.1	3.7	1.8	0.0444	15.3993
2.6	306	2018	18.8	50.8	5	2	0.06	14.769
2.6	307	2018	15	50.9	13.3	1.9	0.1596	12.0853
2.6	308	2018	18.4	44.4	7.9	2.2	0.0948	14.0616
2.6	309	2018	15.8	85.9	12.3	2.5	0.1476	15.607
2.6	310	2018	15.8	54.7	3.9	2.2	0.0468	12.3392
2.6	311	2018	16.6	43.7	1.9	1.9	0.0228	11.9523
2.6	312	2018	16.8	73.6	5.4	1.5	0.0648	15.0359
2.6	313	2018	19.4	77.7	8.3	2.1	0.0996	18.0961
2.6	314	2018	20.8	87.4	12.4	2.6	0.1488	20.6852
2.6	315	2018	18.1	42.4	12	1.9	0.144	13.9601
2.6	316	2018	18.6	74.2	11.3	2.3	0.1356	17.2298
2.6	317	2018	20.7	75.3	4.5	2.8	0.054	18.7561
2.6	318	2018	21.2	66	1.4	5.2	0.0168	17.9013
2.6	319	2018	15.2	50.9	2.6	2.6	0.0312	11.3554
2.6	320	2018	18.8	45.5	7.3	2.2	0.0876	14.4601
2.6	321	2018	19.4	49.9	8.8	2.5	0.1056	15.4987
2.6	322	2018	19.9	56.5	10.5	2.4	0.126	16.7091
2.6	323	2018	20.8	86.9	3.7	3.1	0.0444	19.904
2.6	324	2018	14.6	44.3	1.4	2.7	0.0168	10.1847
2.6	325	2018	14.7	52.6	10.3	3	0.1236	11.666
2.6	326	2018	14.9	68	9.7	2.2	0.1164	13.0885
2.6	327	2018	14.9	71.9	9.3	1.4	0.1116	13.4182
2.6	328	2018	17.2	55.6	7.6	1.4	0.0912	14.0268
2.6	329	2018	17.8	94.8	7.2	2.1	0.0864	17.996
2.6	330	2018	21.2	97.8	3.3	3	0.0396	21.3529
2.6	331	2018	22.8	92.3	5	2.9	0.06	22.5658
2.6	332	2018	19.2	84.1	8.9	2	0.1068	18.5557
2.6	333	2018	18.9	46.6	8.3	2.1	0.0996	14.7356
2.6	334	2018	16	53.4	5	1.8	0.06	12.5258
2.6	335	2018	16.7	46.6	6.1	1.5	0.0732	12.6732
2.6	336	2018	15.4	90.3	10.6	2.1	0.1272	15.4681
2.6	337	2018	17.7	55.2	11.5	1.9	0.138	14.7189
2.6	338	2018	14.6	52.5	11.3	1.5	0.1356	11.7322
2.6	339	2018	15	64.2	11.2	1.7	0.1344	13.0185
2.6	340	2018	12.7	91.3	9.1	3.4	0.1092	12.6541
2.6	341	2018	14.1	91.1	5.2	1.9	0.0624	13.8064
2.6	342	2018	15.5	37.7	2.1	3.3	0.0252	10.4451
2.6	343	2018	10	35.4	6.4	2.4	0.0768	6.06462
2.6	344	2018	11.1	43.4	11.1	2	0.1332	7.94394
2.6	345	2018	12.9	56	8.3	1.8	0.0996	10.232
2.6	346	2018	13.1	52.1	5.2	2.5	0.0624	9.82065
2.6	347	2018	14.2	55.5	6.2	1.5	0.0744	11.2058
2.6	348	2018	16.9	57.6	0.9	2.5	0.0108	13.2929
2.6	349	2018	17.7	48.9	5.5	3.6	0.066	13.5788
2.6	350	2018	10.2	50.7	9.6	2.1	0.1152	7.53634
2.6	351	2018	13.7	35.9	9.8	2.5	0.1176	9.47428
2.6	352	2018	16.8	81.5	8.6	2	0.1032	15.9535
2.6	353	2018	17.7	55.2	8.8	3.4	0.1056	14.4222
2.6	354	2018	13.7	45.7	7.9	2.1	0.0948	10.1041
2.6	355	2018	19.1	79.6	1.7	5.2	0.0204	17.2471
2.6	356	2018	14.6	42.1	5.8	2.2	0.0696	10.4187
2.6	357	2018	12.2	59.3	7.1	1.7	0.0852	9.75214
2.6	358	2018	11	46.8	1.9	3.1	0.0228	7.26856
2.6	359	2018	7	37.9	9.7	2.5	0.1164	3.95524
2.6	360	2018	10.8	62.9	5.2	2.6	0.0624	8.51904
2.6	361	2018	13	58.9	2.5	1.8	0.03	10.0512
2.6	362	2018	14.5	42.7	10.5	1.8	0.126	10.7831
2.6	363	2018	14.3	73.6	10.6	2.1	0.1272	13.0477
2.6	364	2018	14	63.3	9.8	1.7	0.1176	11.9169
2.6	365	2018	14.5	50.5	9.4	2.8	0.1128	11.2617
2.6	1	2019	6.7	27.7	8.4	2.4	0.1008	3.02282
2.6	2	2019	10.3	45.6	9.1	2.5	0.1092	7.21806
2.6	3	2019	12.3	56.8	9.2	2.5	0.1104	9.78344
2.6	4	2019	12.5	51.8	7.4	1.7	0.0888	9.49491
2.6	5	2019	13.3	71	7.3	1.6	0.0876	11.6652
2.6	6	2019	14	30.7	7.7	3.9	0.0924	9.07121
2.6	7	2019	8.9	32.7	2.5	2.4	0.03	4.63748
2.6	8	2019	12.4	53	0.7	2.5	0.0084	8.8719
2.6	9	2019	9	29.6	1.2	4	0.0144	4.3159
2.6	10	2019	9.2	40.6	3.5	2.9	0.042	5.4532
2.6	11	2019	8.4	38.9	10.5	4.6	0.126	5.14353
2.6	12	2019	11.4	50.4	9.9	1.6	0.1188	8.62698
2.6	13	2019	11	33.9	3.5	2.6	0.042	6.54097
2.6	14	2019	10.9	43.7	1.8	3.1	0.0216	6.95789
2.6	15	2019	12.7	50.2	7.7	2.5	0.0924	9.53169
2.6	16	2019	13.5	51.3	10.9	2.4	0.1308	10.5807
2.6	17	2019	14.3	51.1	2.7	2.2	0.0324	10.6076
2.6	18	2019	14.6	51.8	11.4	2.2	0.1368	11.6438
2.6	19	2019	17	79	9.8	4	0.1176	15.9113
2.6	20	2019	11.7	57.9	11.8	2.2	0.1416	9.5407
2.6	21	2019	10.2	36.1	11.9	2.1	0.1428	6.73329
2.6	22	2019	11.3	43.8	11.9	2.5	0.1428	8.17691
2.6	23	2019	9.2	27.5	10.9	2.5	0.1308	5.24086
2.6	24	2019	11.8	61.3	10.8	1.6	0.1296	9.83314
2.6	25	2019	12.6	75.8	7.7	2.2	0.0924	11.36
2.6	26	2019	13.4	32.6	12.7	3.2	0.1524	9.15207
2.6	27	2019	11.5	51.2	12.9	3.2	0.1548	8.90986
2.6	28	2019	11.6	39.6	12	4.8	0.144	8.01245
2.6	29	2019	7.6	33.9	12.9	3.7	0.1548	4.40075
2.6	30	2019	11.7	34.8	13.7	3.3	0.1644	7.96657
2.6	31	2019	11.2	33	13.9	5.1	0.1668	7.33378
2.6	32	2019	9	56	2.4	4.1	0.0288	6.09821
2.6	33	2019	11	47.7	2.5	4	0.03	7.33277
2.6	34	2019	8.2	33.6	1.7	3	0.0204	4.00609
2.6	35	2019	8.9	54.4	5.6	3.7	0.0672	6.20559
2.6	36	2019	10.1	52.2	9.4	2.3	0.1128	7.52114
2.6	37	2019	16.3	75.3	10.4	4.6	0.1248	14.9335
2.6	38	2019	11.4	33.3	3.8	5	0.0456	6.72086
2.6	39	2019	8.3	33.2	12.6	3.8	0.1512	4.91327
2.6	40	2019	9.2	42.9	13.2	2.5	0.1584	6.40444
2.6	41	2019	9.7	42.1	9.4	1.6	0.1128	6.5424
2.6	42	2019	11.6	57.9	1.3	2.3	0.0156	8.57484
2.6	43	2019	9	42.8	13.5	3.1	0.162	6.21387
2.6	44	2019	8.2	50.2	12.2	3	0.1464	5.88862
2.6	45	2019	9.4	54.9	13.7	2.9	0.1644	7.36868
2.6	46	2019	12	52.9	6.7	2.1	0.0804	9.05107
2.6	47	2019	12.8	61.4	14.7	2.1	0.1764	11.0173
2.6	48	2019	9.2	82	14.5	2.8	0.174	8.99523
2.6	49	2019	12.7	66.1	15.1	2.8	0.1812	11.2647
2.6	50	2019	19.6	72	11.5	4.2	0.138	17.8799
2.6	51	2019	21.7	69.7	15.9	3.5	0.1908	19.9964
2.6	52	2019	9.3	31.2	14	3	0.168	5.76542
2.6	53	2019	10.4	32.3	2.5	1.9	0.03	5.8847
2.6	54	2019	14.5	81.7	7.6	2.8	0.0912	13.605
2.6	55	2019	13.5	80.2	2.5	4.1	0.03	12.0094
2.6	56	2019	7.3	84.8	6.5	5.2	0.078	6.54973
2.6	57	2019	8.8	36.6	5.4	3	0.0648	5.01629
2.6	58	2019	10.7	42.2	16.6	3.5	0.1992	7.83396
2.6	59	2019	13.3	31.7	9.5	4.3	0.114	8.69156
2.6	60	2019	17.2	55.3	13.1	3.4	0.1572	14.3142
2.6	61	2019	19.3	76.9	14	5	0.168	18.1967
2.6	62	2019	14.5	38.1	10.5	4.4	0.126	10.2676
2.6	63	2019	10	41	11.8	5.2	0.1416	6.70664
2.6	64	2019	7.4	41.1	15.8	3.2	0.1896	4.89794
2.6	65	2019	11.4	75	14	2.5	0.168	10.625
2.6	66	2019	17.7	58.8	15.1	2.1	0.1812	15.2945
2.6	67	2019	19.6	65.8	8.3	2.2	0.0996	17.1566
2.6	68	2019	20.9	77.9	11.8	3.7	0.1416	19.7409
2.6	69	2019	20.8	95.1	9.7	4.7	0.1164	21.113
2.6	70	2019	21.3	86.9	8.4	4.4	0.1008	20.7164
2.6	71	2019	9.9	46.6	4.5	3	0.054	6.52899
2.6	72	2019	11	35.7	18	1.9	0.216	7.82728
2.6	73	2019	15.2	73.4	19.1	2.9	0.2292	14.4519
2.6	74	2019	18.9	85.5	9.6	4.3	0.1152	18.315
2.6	75	2019	18.8	39.1	4.5	2.6	0.054	13.6122
2.6	76	2019	18.5	80	18.7	2.8	0.2244	18.1672
2.6	77	2019	24	76.6	19.2	3.6	0.2304	23.1166
2.6	78	2019	17.5	68.8	17.3	2.3	0.2076	16.141
2.6	79	2019	17.6	37	17.3	2.4	0.2076	13.4053
2.6	80	2019	14.8	37.1	9.3	2.5	0.1116	10.4554
2.6	81	2019	16.5	45.6	12.5	2.4	0.15	12.869
2.6	82	2019	15.7	93.6	20.1	2.9	0.2412	16.6738
2.6	83	2019	16.1	90.3	9.7	2.6	0.1164	16.0683
2.6	84	2019	19.3	39.5	3	2.1	0.036	13.9731
2.6	85	2019	17.8	56	21.3	2.3	0.2556	15.5422
2.6	86	2019	13.1	44.9	20.7	2.7	0.2484	10.4182
2.6	87	2019	11.3	37.3	21.7	2.8	0.2604	8.3821
2.6	88	2019	13.8	58.7	21.6	2.7	0.2592	12.154
2.6	89	2019	15	71.4	21.8	2.2	0.2616	14.3141
2.6	90	2019	18	66.7	21.9	2.6	0.2628	16.7052
2.6	91	2019	13.3	84.4	14.6	5.8	0.1752	13.009
2.6	92	2019	20.3	38.9	2.2	2.9	0.0264	14.6493
2.6	93	2019	20.2	42.8	10.5	2.9	0.126	15.63
2.6	94	2019	23.1	43.7	21.3	2.9	0.2556	18.9804
2.6	95	2019	20.2	70.1	22.2	2.6	0.2664	19.0971
2.6	96	2019	19.2	86.6	18.1	2.7	0.2172	19.4274
2.6	97	2019	18.3	71.3	7.1	3	0.0852	16.3076
2.6	98	2019	18.3	70.1	14.2	2.9	0.1704	16.7542
2.6	99	2019	18.7	71	19.7	3.1	0.2364	17.5819
2.6	100	2019	20.1	80.5	21.9	4.2	0.2628	19.8922
2.6	101	2019	18.8	67.3	23.5	4.1	0.282	17.5172
2.6	102	2019	17	43.1	24.2	3.3	0.2904	13.8219
2.6	103	2019	22.5	29.5	20.8	2.7	0.2496	16.9783
2.6	104	2019	22.8	63.8	2.8	2.8	0.0336	19.4184
2.6	105	2019	21.7	76.8	16.8	5.2	0.2016	20.6775
2.6	106	2019	24.7	57.8	24.8	2.8	0.2976	22.1246
2.6	107	2019	21.2	86.9	20.2	2.9	0.2424	21.5607
2.6	108	2019	23.2	85	3.7	3	0.0444	22.0829
2.6	109	2019	24.2	95.6	8.4	6.5	0.1008	24.4038
2.6	110	2019	22.7	71.1	21.8	3	0.2616	21.5021
2.6	111	2019	23.8	65.4	25.1	3.2	0.3012	22.1184
2.6	112	2019	23.9	55	12.7	4	0.1524	20.2243
2.6	113	2019	21.9	54.6	6.7	4.8	0.0804	17.8747
2.6	114	2019	23.5	65.2	6.3	5.8	0.0756	20.3392
2.6	115	2019	15	61.7	10	4.5	0.12	12.5623
2.6	116	2019	21.1	55.6	2.4	2.9	0.0288	16.9993
2.6	117	2019	21.5	73.7	11.2	4.2	0.1344	19.8232
2.6	118	2019	22	50.5	27.2	3.3	0.3264	19.0514
2.6	119	2019	20.6	41.6	27.2	3	0.3264	16.9649
2.6	120	2019	24.1	50.4	21.2	4.7	0.2544	20.4557
2.6	121	2019	25.3	71	5.2	6.3	0.0624	22.5294
2.6	122	2019	25.7	50.6	21	3.2	0.252	21.9627
2.6	123	2019	20.4	58.4	21.1	2.8	0.2532	18.0698
2.6	124	2019	21.9	85.1	19.6	3.5	0.2352	21.9969
2.6	125	2019	19.9	49.1	23.2	2.5	0.2784	16.8769
2.6	126	2019	22.1	70.3	20.6	1.9	0.2472	20.8416
2.6	127	2019	25.1	70.9	24.8	2.4	0.2976	23.9591
2.6	128	2019	26.2	71	22.4	2.8	0.2688	24.8388
2.6	129	2019	25.2	83	9.9	2.9	0.1188	24.3446
2.6	130	2019	27.5	73	7.1	4.7	0.0852	25.0878
2.6	131	2019	27.1	27	9.2	1.1	0.1104	19.7235
2.6	132	2019	23.3	73.2	2.8	3.3	0.0336	20.8415
2.6	133	2019	27	71	4.5	3.2	0.054	24.2491
2.6	134	2019	21.6	79.2	25.4	0.9	0.3048	21.6168
2.6	135	2019	24.7	40.1	21.2	2.7	0.2544	19.9713
2.6	136	2019	27	48.1	21.6	3.1	0.2592	22.8635
2.6	137	2019	22.7	49.4	23.1	4.6	0.2772	19.2412
2.6	138	2019	23.5	42.4	11.6	2.1	0.1392	18.5559
2.6	139	2019	25.1	61.3	7.7	2.9	0.0924	21.6691
2.6	140	2019	25.8	84.6	21	2.9	0.252	25.9012
2.6	141	2019	29.7	46.2	20	2.8	0.24	24.9059
2.6	142	2019	18.4	73.3	16.8	4.6	0.2016	17.2273
2.6	143	2019	19.7	46.7	4.7	2.9	0.0564	15.0978
2.6	144	2019	24.8	36.6	8	2.8	0.096	18.7125
2.6	145	2019	26.1	61.1	5.2	3	0.0624	22.3473
2.6	146	2019	28.3	66.7	10.1	4	0.1212	25.3706
2.6	147	2019	21.1	61.2	19.6	4.4	0.2352	18.7923
2.6	148	2019	20.8	58.7	27.9	2.8	0.3348	18.8645
2.6	149	2019	18.4	70.3	22.6	2.4	0.2712	17.4601
2.6	150	2019	19.7	54.5	15.3	2.3	0.1836	16.7025
2.6	151	2019	23.1	55.4	20.7	2.1	0.2484	20.2146
2.6	152	2019	21.4	68.4	3.5	2.7	0.042	18.6549
2.6	153	2019	22.7	71.1	2.9	2.8	0.0348	20.0919
2.6	154	2019	25.4	92.9	5.7	3.8	0.0684	25.2521
2.6	155	2019	28.9	79.6	10.3	4.3	0.1236	27.498
2.6	156	2019	30.5	66.8	4.1	3.2	0.0492	26.9818
2.6	157	2019	26.9	55.1	21.6	2.6	0.2592	23.6162
2.6	158	2019	26.8	53.4	26.4	2.7	0.3168	23.6119
2.6	159	2019	28.5	67.4	24.6	2.6	0.2952	26.7166
2.6	160	2019	25.2	83.1	16.9	4.5	0.2028	24.7811
2.6	161	2019	27.4	35	10.6	3	0.1272	20.9081
2.6	162	2019	27	34.5	14.2	2.9	0.1704	20.7914
2.6	163	2019	28.5	55.7	18.2	2.7	0.2184	24.8942
2.6	164	2019	27.3	77.9	24.5	4.3	0.294	26.725
2.6	165	2019	30.1	67.4	20.7	2.7	0.2484	27.9611
2.6	166	2019	23.7	75.6	3.1	2.5	0.0372	21.5489
2.6	167	2019	24.1	76.3	6.4	2.5	0.0768	22.2878
2.6	168	2019	28	75.2	9	2.6	0.108	26.0978
2.6	169	2019	31.6	67.4	18.1	3	0.2172	29.1702
2.6	170	2019	25.8	73.8	24.1	2.8	0.2892	24.881
2.6	171	2019	24.5	82.5	27.5	2.9	0.33	24.7832
2.6	172	2019	29.3	76.3	20.8	2.9	0.2496	28.305
2.6	173	2019	32.7	76.8	19.7	3.3	0.2364	31.5337
2.6	174	2019	30.3	63.1	26.2	2.7	0.3144	27.9398
2.6	175	2019	24.1	68.6	20.4	2.6	0.2448	22.486
2.6	176	2019	26.6	91.6	7.3	5.8	0.0876	26.3283
2.6	177	2019	30.1	70.9	6.7	2.6	0.0804	27.3771
2.6	178	2019	30.3	70.9	18.2	2.2	0.2184	28.4519
2.6	179	2019	29.8	72.9	10	2.5	0.12	27.6146
2.6	180	2019	32	77.8	6.5	2.1	0.078	30.0818
2.6	181	2019	24.5	85.6	3.3	2.3	0.0396	23.4318
2.6	182	2019	27.2	84.2	3.1	3.5	0.0372	25.8415
2.6	183	2019	31.4	77.5	12.6	2.9	0.1512	29.9013
2.6	184	2019	34.1	73.1	11.7	4	0.1404	31.7632
2.6	185	2019	32.5	75.4	1.7	5.5	0.0204	29.6379
2.6	186	2019	26.1	81.4	5.9	4.8	0.0708	24.6095
2.6	187	2019	31	74.3	17.7	2.3	0.2124	29.5066
2.6	188	2019	29	77.2	10.6	3.2	0.1272	27.3879
2.6	189	2019	33.9	59.8	20.1	2.5	0.2412	30.4381
2.6	190	2019	33.9	71.7	4.5	5	0.054	30.7437
2.6	191	2019	30.1	73.8	14.1	3.5	0.1692	28.2645
2.6	192	2019	35.5	45.8	13.7	2.4	0.1644	29.4812
2.6	193	2019	32.1	72.9	26.9	4.2	0.3228	30.8334
2.6	194	2019	28.8	78.4	19.5	3.9	0.234	27.9395
2.6	195	2019	26.4	81.1	5.5	3	0.066	24.9364
2.6	196	2019	29.7	65.3	15.7	2.4	0.1884	27.0072
2.6	197	2019	27.5	66.6	21.5	2	0.258	25.5353
2.6	198	2019	29	67.3	21.8	2.5	0.2616	27.0053
2.6	199	2019	28.3	81	18.5	4	0.222	27.6974
2.6	200	2019	33.9	61.6	18.2	3.2	0.2184	30.5176
2.6	201	2019	27.3	69.8	18.7	2.5	0.2244	25.5134
2.6	202	2019	26.3	69.6	22.8	2.4	0.2736	24.8207
2.6	203	2019	29.5	68.5	27	2.4	0.324	27.9339
2.6	204	2019	33.2	70.7	21.3	2.6	0.2556	31.3371
2.6	205	2019	30.8	76.2	20	3.5	0.24	29.6429
2.6	206	2019	29.4	80.1	19.7	5.7	0.2364	28.6376
2.6	207	2019	29.8	80.2	13.5	4.4	0.162	28.6802
2.6	208	2019	32.3	76.1	20	3.3	0.24	31.0774
2.6	209	2019	30.8	75.8	15.5	2	0.186	29.3711
2.6	210	2019	31.9	74.8	13	1.7	0.156	30.1279
2.6	211	2019	33.5	73.1	3	3	0.036	30.5399
2.6	212	2019	34.7	59.2	3.8	2.6	0.0456	29.8422
2.6	213	2019	27.8	77.9	14.7	1.5	0.1764	26.7225
2.6	214	2019	32.9	76.2	19.1	2.3	0.2292	31.6631
2.6	215	2019	31.7	79.2	13.5	2.2	0.162	30.5175
2.6	216	2019	33.7	64.8	11	3.3	0.132	30.2431
2.6	217	2019	32.8	74	4.2	3.1	0.0504	30.0941
2.6	218	2019	36.8	63.6	5	3.8	0.06	32.4202
2.6	219	2019	36.9	67.1	6.3	3	0.0756	33.1753
2.6	220	2019	35.5	68.4	8.9	5.9	0.1068	32.1013
2.6	221	2019	31	80.7	5.4	3.4	0.0648	29.3242
2.6	222	2019	31.5	61.9	10.4	2.5	0.1248	27.834
2.6	223	2019	26.4	69.4	18.5	2.6	0.222	24.6036
2.6	224	2019	26.1	70.6	15.9	3	0.1908	24.2567
2.6	225	2019	29.2	67.1	21.7	2.9	0.2604	27.1379
2.6	226	2019	25.1	70.6	19.4	2.4	0.2328	23.5888
2.6	227	2019	30.7	69.8	18.1	2.6	0.2172	28.6593
2.6	228	2019	27.7	87	21.6	2.2	0.2592	28.1291
2.6	229	2019	30.2	84	23.1	2.6	0.2772	30.2952
2.6	230	2019	27.4	70.6	23.8	2.6	0.2856	26.0196
2.6	231	2019	31.4	65.3	22.5	2.1	0.27	29.0493
2.6	232	2019	32.5	65.9	21.3	2.4	0.2556	30.0545
2.6	233	2019	29.1	70.6	22	3.3	0.264	27.469
2.6	234	2019	29.9	89.2	22.6	3.3	0.2712	30.5788
2.6	235	2019	27.8	73.2	20.7	3.2	0.2484	26.4771
2.6	236	2019	33.4	63.4	14.2	1.9	0.1704	30.0967
2.6	237	2019	34.2	67.1	10.2	2.2	0.1224	31.0219
2.6	238	2019	34.3	67	16.9	2	0.2028	31.6061
2.6	239	2019	32.4	77	17.9	2.8	0.2148	31.1808
2.6	240	2019	32.7	82	17	5.9	0.204	31.8941
2.6	241	2019	32.5	86.7	8.6	3.4	0.1032	31.8372
2.6	242	2019	31.7	86.1	6.2	4	0.0744	30.7382
2.6	243	2019	27.9	72.5	16.9	3.5	0.2028	26.2179
2.6	244	2019	28.2	74.5	21.6	4.1	0.2592	27.0181
2.6	245	2019	25.2	87.2	21.9	4	0.2628	25.5946
2.6	246	2019	26.6	90.1	13.5	2.7	0.162	26.8152
2.6	247	2019	32.3	75.1	4.7	2.1	0.0564	29.8635
2.6	248	2019	32.2	78.6	21.6	1.9	0.2592	31.4929
2.6	249	2019	30.7	82.3	17.5	1.6	0.21	30.2637
2.6	250	2019	28.5	90	9.1	2.6	0.1092	28.3682
2.6	251	2019	29	83.7	2.5	2.1	0.03	27.5734
2.6	252	2019	26.2	83.9	7.5	2.1	0.09	25.2782
2.6	253	2019	30.6	63	9.5	2.2	0.114	27.0959
2.6	254	2019	27.7	65.5	15.5	2.9	0.186	25.1367
2.6	255	2019	24.8	85.7	15.6	3.1	0.1872	24.6645
2.6	256	2019	28.1	85.8	3.3	3	0.0396	26.9614
2.6	257	2019	21.5	97.8	11.7	4.8	0.1404	22.2414
2.6	258	2019	20.7	98.3	19.6	3.3	0.2352	22.1197
2.6	259	2019	25.1	99.5	15	2.9	0.18	26.4562
2.6	260	2019	27.8	100	5.5	3.2	0.066	28.5266
2.6	261	2019	31	97.1	15	3.6	0.18	32.1599
2.6	262	2019	29.3	88.9	19.3	6.2	0.2316	29.5678
2.6	263	2019	33.6	70.5	9.9	3.2	0.1188	30.8434
2.6	264	2019	26.1	58.8	6.1	2.4	0.0732	22.1959
2.6	265	2019	24.2	56.6	8.6	2.2	0.1032	20.4513
2.6	266	2019	22.7	70.3	7.6	2.7	0.0912	20.412
2.6	267	2019	23.6	67.7	3.7	2.8	0.0444	20.6485
2.6	268	2019	24.2	75.5	2.3	3.3	0.0276	21.8999
2.6	269	2019	23.5	76.3	2.5	3.3	0.03	21.3335
2.6	270	2019	24.3	76.5	3.7	2.6	0.0444	22.2663
2.6	271	2019	28	75.5	8.5	2.1	0.102	26.1222
2.6	272	2019	25.8	70.5	2.4	1.4	0.0288	22.9825
2.6	273	2019	26.3	72	3.7	1.9	0.0444	23.7092
2.6	274	2019	29	60.7	1.1	2.4	0.0132	24.6238
2.6	275	2019	24	54.2	3.2	2.8	0.0384	19.5271
2.6	276	2019	23.4	61.6	6.1	2.9	0.0732	20.0153
2.6	277	2019	24.9	46.1	1.9	2.2	0.0228	19.359
2.6	278	2019	26.9	51.4	4.1	1.6	0.0492	21.9395
2.6	279	2019	27.2	70.2	4.2	2.3	0.0504	24.3699
2.6	280	2019	27.7	75.3	3	2.6	0.036	25.3219
2.6	281	2019	26.6	86.8	16.8	2.5	0.2016	26.683
2.6	282	2019	24.9	76	17.6	2.6	0.2112	23.8629
2.6	283	2019	23	70.3	16.8	2.4	0.2016	21.4051
2.6	284	2019	25.6	78.3	16	2.5	0.192	24.6854
2.6	285	2019	27.2	78.3	13.7	2.6	0.1644	26.056
2.6	286	2019	29.7	82.2	15	2.1	0.18	29.0721
2.6	287	2019	30.6	78.6	11.7	2.2	0.1404	29.2437
2.6	288	2019	26	69.8	15.3	2.2	0.1836	24.0751
2.6	289	2019	24.8	78.8	15.1	1.9	0.1812	23.9398
2.6	290	2019	25	76.2	14.9	1.4	0.1788	23.86
2.6	291	2019	25.7	73.5	14.5	2.3	0.174	24.1463
2.6	292	2019	27.3	63.1	13.7	2.4	0.1644	24.3836
2.6	293	2019	27.2	72.8	10.6	2.6	0.1272	25.1795
2.6	294	2019	23.5	85.2	12.2	2.6	0.1464	23.1104
2.6	295	2019	26.3	87.4	13.7	4	0.1644	26.1478
2.6	296	2019	26.1	83.1	9.9	3.3	0.1188	25.2127
2.6	297	2019	20.1	38.7	2.5	5	0.03	14.3667
2.6	298	2019	17.6	46	5.7	2.9	0.0684	13.2904
2.6	299	2019	15.4	83.8	13.4	2.6	0.1608	15.116
2.6	300	2019	17.8	60.7	12.3	2.6	0.1476	15.3207
2.6	301	2019	19.5	73.6	11.3	2.6	0.1356	18.0125
2.6	302	2019	19.2	59.8	6.2	3	0.0744	16.0072
2.6	303	2019	17.7	59.5	5.8	3.8	0.0696	14.5368
2.6	304	2019	16.9	66.2	11.2	2.5	0.1344	14.8989
2.6	305	2019	18.8	39.9	7.5	2.1	0.09	13.9653
2.6	306	2019	21.2	61.5	1.4	1.5	0.0168	17.6661
2.6	307	2019	21.9	86	12.7	2.9	0.1524	21.6378
2.6	308	2019	18.5	40	4.2	3.2	0.0504	13.3797
2.6	309	2019	14	56	13.2	2.9	0.1584	11.5363
2.6	310	2019	15.2	64.8	11.7	1.9	0.1404	13.2788
2.6	311	2019	17	60	10.7	1.8	0.1284	14.4536
2.6	312	2019	17.3	58.8	5.7	1.3	0.0684	14.2464
2.6	313	2019	18.7	40.5	11.2	2.4	0.1344	14.2111
2.6	314	2019	17.1	42.6	12.4	2.1	0.1488	13.1375
2.6	315	2019	16.6	49.6	10.4	1.5	0.1248	13.1903
2.6	316	2019	18.9	63.5	10.8	1.5	0.1296	16.5319
2.6	317	2019	21.7	73.4	7	2.4	0.084	19.7521
2.6	318	2019	21.5	86.8	7.5	2.9	0.09	20.917
2.6	319	2019	16.2	54.7	6.9	2.2	0.0828	12.9501
2.6	320	2019	13	75.3	7.6	1.9	0.0912	11.7139
2.6	321	2019	14.3	72	2.4	2.2	0.0288	12.2355
2.6	322	2019	16.2	46.5	11.4	2.4	0.1368	12.6015
2.6	323	2019	20.3	39.5	8.7	4	0.1044	15.1922
2.6	324	2019	14.7	51.9	1.6	2.1	0.0192	10.9338
2.6	325	2019	14.5	69.5	6.8	1.8	0.0816	12.6238
2.6	326	2019	15	62.7	10.4	1.8	0.1248	12.8292
2.6	327	2019	13.6	60.3	7	1.9	0.084	11.081
2.6	328	2019	13.6	61.6	1.2	2.4	0.0144	10.6536
2.6	329	2019	16.6	99.9	7.5	3.2	0.09	17.1814
2.6	330	2019	15.9	85.8	7.5	3.6	0.09	15.2578
2.6	331	2019	12	56.4	6.3	2.6	0.0756	9.24285
2.6	332	2019	18.4	90.3	9.3	2.4	0.1116	18.3451
2.6	333	2019	21.4	75.5	6.7	2.6	0.0804	19.6409
2.6	334	2019	14.7	62.9	0.7	2.4	0.0084	11.7193
2.6	335	2019	14.6	67.9	12	1.7	0.144	13.0066
2.6	336	2019	16.8	82.2	11.1	2.5	0.1332	16.1817
2.6	337	2019	13.7	60.5	6.9	3.1	0.0828	11.1107
2.6	338	2019	11.8	42.5	7.2	2.2	0.0864	8.1613
2.6	339	2019	11.4	38.8	10.7	1.7	0.1284	7.8636
2.6	340	2019	12.5	38.8	7.6	1.9	0.0912	8.53909
2.6	341	2019	11.9	68.7	3.1	1.7	0.0372	9.81895
2.6	342	2019	12.9	56.2	3	1.6	0.036	9.81318
2.6	343	2019	14	30.8	10.8	1.7	0.1296	9.45067
2.6	344	2019	13.7	55.5	7.9	3.2	0.0948	10.7997
2.6	345	2019	13.6	35.4	7.2	1.9	0.0864	9.17735
2.6	346	2019	15.5	56.4	6.6	1.6	0.0792	12.4738
2.6	347	2019	15.3	46.2	2.4	1.8	0.0288	11.0861
2.6	348	2019	14.4	47.4	8	2.9	0.096	10.8094
2.6	349	2019	11.7	47.5	3	1.7	0.036	8.10593
2.6	350	2019	12.7	79.2	7.3	2.1	0.0876	11.682
2.6	351	2019	10.7	56.6	9	2	0.108	8.34105
2.6	352	2019	12.1	56.8	9.8	1.7	0.1176	9.69641
2.6	353	2019	13.2	57.9	10.3	2.4	0.1236	10.77
2.6	354	2019	9.3	34.1	10.1	2.4	0.1212	5.69206
2.6	355	2019	9.1	73	8.7	2.4	0.1044	7.90293
2.6	356	2019	11.7	89.2	6.3	5.3	0.0756	11.1658
2.6	357	2019	11.9	64.9	8.1	2.5	0.0972	9.91942
2.6	358	2019	13.2	62.1	5.4	2.3	0.0648	10.6971
2.6	359	2019	11.1	68.7	0.8	2.7	0.0096	8.80887
2.6	360	2019	6.2	39.9	9.2	3.1	0.1104	3.31589
2.6	361	2019	8.3	44.9	5.3	2.8	0.0636	5.10993
2.6	362	2019	10.8	63.8	3.1	2.2	0.0372	8.4234
2.6	363	2019	12.8	27.4	7.2	2.9	0.0864	7.85125
2.6	364	2019	13.7	53.5	10.1	2.9	0.1212	10.8372
2.6	365	2019	12.9	46.6	10.9	2.7	0.1308	9.67983
2.6	1	2020	15.5	36.2	8.3	2.5	0.0996	10.8914
2.6	2	2020	13.7	63.4	8.7	1.8	0.1044	11.5557
2.6	3	2020	12.3	52	7.9	2.2	0.0948	9.34442
2.6	4	2020	10.8	44.4	3.7	2.7	0.0444	7.10962
2.6	5	2020	9.8	40.5	7.5	1.4	0.09	6.38137
2.6	6	2020	9.6	51.7	3.2	3	0.0384	6.48908
2.6	7	2020	8.8	37.3	9.7	1.7	0.1164	5.48535
2.6	8	2020	15.1	63.5	10.1	4.5	0.1212	12.8083
2.6	9	2020	9.8	27.5	9.5	3.6	0.114	5.55786
2.6	10	2020	8.2	33.9	3.6	4.3	0.0432	4.11724
2.6	11	2020	7.8	34.9	2.8	2.5	0.0336	3.877
2.6	12	2020	11.1	56.5	10.5	2.6	0.126	8.77781
2.6	13	2020	12.3	49.3	11.2	2.3	0.1344	9.4011
2.6	14	2020	10.4	83.6	9.3	1.6	0.1116	9.94741
2.6	15	2020	12.2	49.8	1.7	3	0.0204	8.52153
2.6	16	2020	12.5	45.5	3.7	2.6	0.0444	8.66653
2.6	17	2020	13.5	44.4	11.6	2.6	0.1392	10.0929
2.6	18	2020	14.3	44.7	11.7	2.6	0.1404	10.8159
2.6	19	2020	16.9	28.6	10.5	5	0.126	11.4401
2.6	20	2020	6.1	38.7	11.5	4.9	0.138	3.24056
2.6	21	2020	5.8	28	11.7	4.2	0.1404	2.46005
2.6	22	2020	8.1	33.7	12	2.7	0.144	4.79515
2.6	23	2020	11.2	37.3	11.6	1.7	0.1392	7.6579
2.6	24	2020	13.4	33.8	12.1	1	0.1452	9.32465
2.6	25	2020	17.9	80.2	12.3	4.9	0.1476	17.0289
2.6	26	2020	21.9	49.6	12.8	2.4	0.1536	17.9848
2.6	27	2020	12.7	74	12.5	1.6	0.15	11.7311
2.6	28	2020	12.7	39.7	12.6	2.4	0.1512	9.13805
2.6	29	2020	8.8	36.3	5	2.4	0.06	4.99784
2.6	30	2020	8.4	32.9	1.7	3	0.0204	4.12936
2.6	31	2020	9	34.9	14.1	3	0.1692	5.76051
2.6	32	2020	9.9	33.3	9.9	2.6	0.1188	6.11266
2.6	33	2020	13.9	35.5	8	3.6	0.096	9.40458
2.6	34	2020	6.1	37.8	6.8	2.9	0.0816	2.932
2.6	35	2020	12.3	56.2	9.2	2.4	0.1104	9.74518
2.6	36	2020	15.7	53.1	10.6	3.6	0.1272	12.5852
2.6	37	2020	15.4	36.7	6.7	5.4	0.0804	10.5521
2.6	38	2020	7	43.9	10.9	4.2	0.1308	4.29854
2.6	39	2020	9.1	55.4	8.6	2.9	0.1032	6.74042
2.6	40	2020	13.6	56.6	7.1	2.7	0.0852	10.7582
2.6	41	2020	15	29.7	1.4	2.1	0.0168	9.37923
2.6	42	2020	16.8	29	12.2	2.2	0.1464	11.6831
2.6	43	2020	19.9	67.9	6.1	5	0.0732	17.2948
2.6	44	2020	21.1	40.2	14.4	5.1	0.1728	16.3136
2.6	45	2020	9.5	37	7.2	4.2	0.0864	5.7127
2.6	46	2020	10.5	60	15	3.2	0.18	8.77783
2.6	47	2020	10.5	36.4	14.8	3.2	0.1776	7.15724
2.6	48	2020	9	43.7	13.3	3.4	0.1596	6.23925
2.6	49	2020	10	42.2	14.4	3.9	0.1728	7.05393
2.6	50	2020	10.5	45	15.2	2.8	0.1824	7.79414
2.6	51	2020	14	61.2	13.1	3.5	0.1572	11.9016
2.6	52	2020	9.6	31.5	1.2	2.4	0.0144	5.0246
2.6	53	2020	8.8	49.5	16.2	2.8	0.1944	6.67601
2.6	54	2020	9	43.2	15.3	2.9	0.1836	6.38133
2.6	55	2020	10.5	57	8.1	2.3	0.0972	8.09887
2.6	56	2020	15.1	54.3	6.4	6	0.0768	11.6746
2.6	57	2020	9.8	40.9	16.4	4	0.1968	6.93318
2.6	58	2020	13.2	67.4	15.1	2.5	0.1812	11.8446
2.6	59	2020	13.9	63.3	17.8	2.6	0.2136	12.3599
2.6	60	2020	11.7	81.2	18.4	2.5	0.2208	11.6636
2.6	61	2020	14.7	49.5	14.6	3.6	0.1752	11.7056
2.6	62	2020	8	28.3	14.6	3.7	0.1752	4.51884
2.6	63	2020	5.7	41	14.3	3.7	0.1716	3.3029
2.6	64	2020	10.3	39.2	9.5	2.8	0.114	6.80074
2.6	65	2020	13.8	49.9	2.2	2.8	0.0264	9.99384
2.6	66	2020	16	61.7	16.1	1.9	0.1932	14.0794
2.6	67	2020	20.1	71.1	16.3	3	0.1956	18.686
2.6	68	2020	23	80	17.3	3.7	0.2076	22.3795
2.6	69	2020	19.8	65.6	16.9	6	0.2028	17.7497
2.6	70	2020	13.2	63.3	17.9	2.1	0.2148	11.7514
2.6	71	2020	13.8	53.9	17.9	2.5	0.2148	11.5501
2.6	72	2020	17.4	63.4	18.3	3.6	0.2196	15.5648
2.6	73	2020	21	36.3	6.1	5	0.0732	15.2018
2.6	74	2020	11.3	52	4.7	4.2	0.0564	8.07707
2.6	75	2020	12	57.7	19	2.8	0.228	10.2759
2.6	76	2020	15.7	78.3	14.4	3.1	0.1728	14.9967
2.6	77	2020	13.3	61.3	4.7	3.7	0.0564	10.5883
2.6	78	2020	17.4	69.9	2.8	3.8	0.0336	14.9242
2.6	79	2020	16.5	34.8	13.2	4.9	0.1584	11.8539
2.6	80	2020	11.2	49.9	20.3	4.5	0.2436	8.99436
2.6	81	2020	11.3	60	20.3	4.1	0.2436	9.81631
2.6	82	2020	13.2	64.6	16.5	3.2	0.198	11.6909
2.6	83	2020	13.4	57.8	17.2	2.9	0.2064	11.4209
2.6	84	2020	13.6	60.4	19.1	2.8	0.2292	11.9363
2.6	85	2020	14.4	73.4	6.1	3	0.0732	12.7132
2.6	86	2020	17.4	88.4	2.8	3.9	0.0336	16.5504
2.6	87	2020	21.8	44.9	22.4	3.2	0.2688	18.0321
2.6	88	2020	14.6	32.1	22	2.7	0.264	10.7754
2.6	89	2020	13.6	56.6	22.3	2.8	0.2676	11.8489
2.6	90	2020	13.5	62.5	22.7	2.2	0.2724	12.2712
2.6	91	2020	12	38.7	19.8	3.6	0.2376	8.90652
2.6	92	2020	11.3	49	2.9	2.6	0.0348	7.80181
2.6	93	2020	14.9	70.3	22.1	1.7	0.2652	14.1782
2.6	94	2020	20.1	89.5	20.2	3.4	0.2424	20.6943
2.6	95	2020	21.6	61.7	16.1	3.5	0.1932	19.1128
2.6	96	2020	9.3	68.2	22.1	5	0.2652	8.58828
2.6	97	2020	15.7	49.5	11.8	2.9	0.1416	12.4177
2.6	98	2020	18.6	72.3	6.6	4.9	0.0792	16.5323
2.6	99	2020	12.5	41.1	20.7	5.3	0.2484	9.46901
2.6	100	2020	11.3	46.3	22.9	4.6	0.2748	8.98729
2.6	101	2020	15.3	53.3	24	4.1	0.288	13.1379
2.6	102	2020	16	41.1	13.8	2.9	0.1656	12.1242
2.6	103	2020	16.8	62.7	9.5	3	0.114	14.3425
2.6	104	2020	18.2	74.5	12	3.1	0.144	16.8839
2.6	105	2020	20.4	44.4	20.6	2.8	0.2472	16.6802
2.6	106	2020	19.1	40.9	24.7	2.9	0.2964	15.4773
2.6	107	2020	20.2	36.8	24.1	2.6	0.2892	16.0035
2.6	108	2020	22.5	56.4	21.5	3	0.258	19.7791
2.6	109	2020	19.1	90.1	20.2	4.1	0.2424	19.7139
2.6	110	2020	20.2	63	3.3	3.8	0.0396	16.9324
2.6	111	2020	21.3	47.7	21.3	3	0.2556	17.8203
2.6	112	2020	23.5	57.1	25.7	2.4	0.3084	21.0412
2.6	113	2020	26.9	56.3	24.1	1.8	0.2892	23.9547
2.6	114	2020	29	56.6	21.8	3	0.2616	25.6704
2.6	115	2020	30	51.5	12.6	2.9	0.1512	25.3054
2.6	116	2020	20.1	63	18	2.9	0.216	18.0305
2.6	117	2020	18.7	75.1	26.8	2.9	0.3216	18.4031
2.6	118	2020	19.7	88.1	23	3	0.276	20.3624
2.6	119	2020	22.8	89.5	11.2	2.9	0.1344	22.7757
2.6	120	2020	26.5	33	25.8	2.9	0.3096	20.9574
2.6	121	2020	25.4	48.3	24.4	3.2	0.2928	21.6509
2.6	122	2020	19.2	31.5	20.8	3	0.2496	14.4383
2.6	123	2020	17.2	73.9	15.8	2.2	0.1896	16.2083
2.6	124	2020	18.3	55.4	19.7	2.9	0.2364	15.7994
2.6	125	2020	17.3	45.9	4	1.6	0.048	12.9505
2.6	126	2020	21	48.2	9.3	2.9	0.1116	16.7569
2.6	127	2020	22	61.5	24.3	3.3	0.2916	20.0023
2.6	128	2020	21.9	67.6	22.7	4.7	0.2724	20.3521
2.6	129	2020	19.7	50.7	4.8	2.9	0.0576	15.486
2.6	130	2020	20	63.3	16.1	3.2	0.1932	17.819
2.6	131	2020	21.5	40.1	8.1	1.8	0.0972	16.3503
2.6	132	2020	14.8	69.7	20.6	2.6	0.2472	13.8892
2.6	133	2020	18.1	70.7	11	3.4	0.132	16.3521
2.6	134	2020	18.9	92.4	16.3	3	0.1956	19.527
2.6	135	2020	23.3	84.8	12.2	2.7	0.1464	22.8658
2.6	136	2020	23.9	81.7	3.8	5.2	0.0456	22.3003
2.6	137	2020	22.5	56.1	15.5	4.6	0.186	19.2538
2.6	138	2020	25.6	62.4	23.6	3.8	0.2832	23.3251
2.6	139	2020	26.4	66.8	6.1	3.4	0.0732	23.3266
2.6	140	2020	27.1	70.7	12.4	3.3	0.1488	24.9374
2.6	141	2020	24.7	93.4	8.8	4.4	0.1056	24.8221
2.6	142	2020	25.6	86.1	15.3	4.5	0.1836	25.3961
2.6	143	2020	27.7	63.1	25.6	2.5	0.3072	25.5267
2.6	144	2020	25	61.3	22.5	2.7	0.27	22.649
2.6	145	2020	25	62.6	2.4	1.7	0.0288	21.3404
2.6	146	2020	23.9	69.8	8	3.4	0.096	21.4792
2.6	147	2020	26.3	75.4	25.7	3.2	0.3084	25.6101
2.6	148	2020	29.9	70.4	20.2	1.7	0.2424	28.1738
2.6	149	2020	28.4	77.8	26.2	3	0.3144	27.9449
2.6	150	2020	28.8	63.8	25.4	2.9	0.3048	26.5885
2.6	151	2020	25.5	54.7	13.2	2.7	0.1584	21.7353
2.6	152	2020	28	55.4	3.8	1.4	0.0456	23.3753
2.6	153	2020	26.8	66.6	20.1	2	0.2412	24.7949
2.6	154	2020	26.3	67.2	17.9	1.5	0.2148	24.281
2.6	155	2020	30.1	63.8	11.8	2	0.1416	26.9262
2.6	156	2020	29.5	70.7	8	2.7	0.096	26.8878
2.6	157	2020	27.5	70.9	24.4	4	0.2928	26.1048
2.6	158	2020	23.1	76.4	10.3	3	0.1236	21.6257
2.6	159	2020	24.5	75.8	5.6	3	0.0672	22.521
2.6	160	2020	26.2	86.7	23	2.8	0.276	26.664
2.6	161	2020	23.6	90.8	20.8	3	0.2496	24.3813
2.6	162	2020	24.9	81.3	8.4	3.4	0.1008	23.7165
2.6	163	2020	25.6	93.7	24.1	4.3	0.2892	26.837
2.6	164	2020	30.1	54.3	12.1	2.7	0.1452	25.7186
2.6	165	2020	26.8	64.2	24	2	0.288	24.761
2.6	166	2020	24.7	72.6	12.4	2.7	0.1488	22.9203
2.6	167	2020	29.2	76.4	2.7	3.5	0.0324	26.8114
2.6	168	2020	31	74	4.7	3.5	0.0564	28.4021
2.6	169	2020	32.5	73.4	24.7	2.9	0.2964	31.2264
2.6	170	2020	31.6	74.7	21.8	2.7	0.2616	30.3753
2.6	171	2020	28.3	79.8	22	2.7	0.264	27.8547
2.6	172	2020	23.7	88.5	10.5	2.1	0.126	23.5575
2.6	173	2020	25.1	75.6	24.6	2	0.2952	24.4904
[truncated: 92,234 more rows]
